# Supplementary material for: Functional and Transcriptional Effects of a Hydrogen Sulfide Donor on the Intestinal Epithelial Barrier
Source: Research Square preprint supplement (doi:10.21203/rs.3.rs-7324506/v1), 2025-09-27
Supplement: Supplementary file 1 [file 20918d534e6ffb49e0f57013.xlsx]

## Sheet: Sheet 1
symbol	gene_title	fc	p	q
IFIH1	interferon induced with helicase C domain 1	1.7708	1	1
PSMB9	proteasome 20S subunit beta 9	1.3817	1	1
PARP12	poly(ADP-ribose) polymerase family member 12	1.3515	1	1
CASP1	caspase 1	1.2798	1	1
B2M	beta-2-microglobulin	1.2547	1	1
LPAR6	lysophosphatidic acid receptor 6	1.2146	1	1
PSMB8	proteasome 20S subunit beta 8	1.1621	1	1
RTP4	receptor transporter protein 4	1.1407	1	1
TRIM21	tripartite motif containing 21	1.1363	1	1
CCRL2	C-C motif chemokine receptor like 2	1.1225	1	1
DHX58	DExH-box helicase 58	1.1182	1	1
WARS1	tryptophanyl-tRNA synthetase 1	1.0614	1	1
MVB12A	multivesicular body subunit 12A	-1.0316	1	1
MX1	MX dynamin like GTPase 1	-0.9345	1	1
PROCR	protein C receptor	0.9061	1	1
STAT2	signal transducer and activator of transcription 2	-0.8595	1	1
TRAFD1	TRAF-type zinc finger domain containing 1	0.7903	1	1
IFITM2	interferon induced transmembrane protein 2	0.7842	1	1
IFI27	interferon alpha inducible protein 27	0.7587	1	1
BATF2	basic leucine zipper ATF-like transcription factor 2	0.7080	1	1
PARP14	poly(ADP-ribose) polymerase family member 14	0.6780	1	1
NMI	N-myc and STAT interactor	0.6740	1	1
PARP9	poly(ADP-ribose) polymerase family member 9	0.6722	1	1
OASL	2'-5'-oligoadenylate synthetase like	-0.6527	1	1
TRIM5	tripartite motif containing 5	0.6273	1	1
LGALS3BP	galectin 3 binding protein	-0.6047	1	1
IFI30	IFI30 lysosomal thiol reductase	-0.6043	1	1
USP18	ubiquitin specific peptidase 18	0.5751	1	1
CASP8	caspase 8	0.5589	1	1
IFITM3	interferon induced transmembrane protein 3	0.5524	1	1
IRF2	interferon regulatory factor 2	0.5412	1	1
HELZ2	helicase with zinc finger 2	-0.5306	1	1
RSAD2	radical S-adenosyl methionine domain containing 2	-0.5303	1	1
HERC6	HECT and RLD domain containing E3 ubiquitin protein ligase f...	0.4896	1	1
IFIT3	interferon induced protein with tetratricopeptide repeats 3	-0.4752	1	1
SLC25A28	solute carrier family 25 member 28	0.4583	1	1
NCOA7	nuclear receptor coactivator 7	0.4337	1	1
EIF2AK2	eukaryotic translation initiation factor 2 alpha kinase 2	0.4139	1	1
TAP1	transporter 1, ATP binding cassette subfamily B member	-0.4139	1	1
TENT5A	terminal nucleotidyltransferase 5A	0.4073	1	1
ELF1	E74 like ETS transcription factor 1	0.3962	1	1
CXCL10	C-X-C motif chemokine ligand 10	0.3928	1	1
CSF1	colony stimulating factor 1	0.3850	1	1
UBA7	ubiquitin like modifier activating enzyme 7	0.3817	1	1
PLSCR1	phospholipid scramblase 1	-0.3811	1	1
IRF9	interferon regulatory factor 9	-0.3808	1	1
NUB1	negative regulator of ubiquitin like proteins 1	0.3786	1	1
TDRD7	tudor domain containing 7	0.3778	1	1
TRIM26	tripartite motif containing 26	0.3482	1	1
RIPK2	receptor interacting serine/threonine kinase 2	0.3464	1	1
GBP4	guanylate binding protein 4	0.3249	1	1
SP110	SP110 nuclear body protein	-0.3140	1	1
CD74	CD74 molecule	0.3136	1	1
TRIM14	tripartite motif containing 14	-0.3085	1	1
PSME2	proteasome activator subunit 2	0.3054	1	1
TMEM140	transmembrane protein 140	0.3032	1	1
ISG20	interferon stimulated exonuclease gene 20	0.2946	1	1
SELL	selectin L	0.2780	1	1
SAMD9L	sterile alpha motif domain containing 9 like	0.2726	1	1
GMPR	guanosine monophosphate reductase	-0.2577	1	1
IRF1	interferon regulatory factor 1	-0.2454	1	1
EPSTI1	epithelial stromal interaction 1	0.2175	1	1
TXNIP	thioredoxin interacting protein	0.2104	1	1
IRF1	interferon regulatory factor 1	0.2079	1	1
OAS1	2'-5'-oligoadenylate synthetase 1	-0.2062	1	1
PSMA3	proteasome 20S subunit alpha 3	0.2031	1	1
IL15	interleukin 15	0.1991	1	1
LAMP3	lysosomal associated membrane protein 3	0.1883	1	1
OGFR	opioid growth factor receptor	-0.1821	1	1
C1S	complement C1s	0.1361	1	1
CD47	CD47 molecule	0.1336	1	1
DDX60	DExD/H-box helicase 60	-0.1279	1	1
BST2	bone marrow stromal cell antigen 2	0.1004	1	1
GBP2	guanylate binding protein 2	0.0970	1	1
HLA-C	major histocompatibility complex, class I, C	0.0754	1	1
RIPK2	receptor interacting serine/threonine kinase 2	0.0689	1	1
PSME1	proteasome activator subunit 1	-0.0588	1	1
MOV10	Mov10 RNA helicase	-0.0578	1	1
IFI35	interferon induced protein 35	-0.0514	1	1
CMPK2	cytidine/uridine monophosphate kinase 2	0.0293	1	1
PNPT1	polyribonucleotide nucleotidyltransferase 1	-0.0287	1	1
CMTR1	cap methyltransferase 1	0.0260	1	1
