# Supplementary material for: Functional and Transcriptional Effects of a Hydrogen Sulfide Donor on the Intestinal Epithelial Barrier
Source: Research Square preprint supplement (doi:10.21203/rs.3.rs-7324506/v1), 2025-09-27
Supplement: Supplementary file 2 [file 35b90ec32f9cfcc5d32500f2.xlsx]

## Sheet: Sheet 1
symbol	gene_title	fc	p	q
COX5A	cytochrome c oxidase subunit 5A	2.5468	1	1
FH	fumarate hydratase	2.4904	1	1
COX6C	cytochrome c oxidase subunit 6C	2.4243	1	1
HCCS	holocytochrome c synthase	2.2135	1	1
TOMM70	translocase of outer mitochondrial membrane 70	2.1849	1	1
NDUFA4	NDUFA4 mitochondrial complex associated	2.1637	1	1
SLC25A5	solute carrier family 25 member 5	2.1416	1	1
UQCRFS1	ubiquinol-cytochrome c reductase, Rieske iron-sulfur polypep...	2.0655	1	1
ATP5MC3	ATP synthase membrane subunit c locus 3	2.0035	1	1
COX17	cytochrome c oxidase copper chaperone COX17	1.9593	1	1
COX7B	cytochrome c oxidase subunit 7B	1.9173	1	1
MRPL11	mitochondrial ribosomal protein L11	1.8808	1	1
ISCU	iron-sulfur cluster assembly enzyme	1.8573	1	1
SLC25A4	solute carrier family 25 member 4	1.8481	1	1
FDX1	ferredoxin 1	1.7427	1	1
ATP6V1G1	ATPase H+ transporting V1 subunit G1	1.7342	1	1
SLC25A3	solute carrier family 25 member 3	1.6590	1	1
ATP5PO	ATP synthase peripheral stalk subunit OSCP	1.6279	1	1
NDUFB6	NADH:ubiquinone oxidoreductase subunit B6	1.6230	1	1
NDUFA8	NADH:ubiquinone oxidoreductase subunit A8	1.6026	1	1
NDUFB5	NADH:ubiquinone oxidoreductase subunit B5	1.5858	1	1
ATP5PF	ATP synthase peripheral stalk subunit F6	1.5735	1	1
CYC1	cytochrome c1	1.5724	1	1
COX7A2	cytochrome c oxidase subunit 7A2	1.5387	1	1
HADHB	hydroxyacyl-CoA dehydrogenase trifunctional multienzyme comp...	1.4957	1	1
OAT	ornithine aminotransferase	1.4810	1	1
NDUFC1	NADH:ubiquinone oxidoreductase subunit C1	1.4420	1	1
SDHD	succinate dehydrogenase complex subunit D	1.4134	1	1
NDUFS3	NADH:ubiquinone oxidoreductase core subunit S3	1.4125	1	1
ATP6V0E1	ATPase H+ transporting V0 subunit e1	1.3946	1	1
COX10	cytochrome c oxidase assembly factor heme A:farnesyltransfer...	1.3570	1	1
UQCRC2	ubiquinol-cytochrome c reductase core protein 2	1.3517	1	1
COX6A1	cytochrome c oxidase subunit 6A1	1.3423	1	1
UQCRQ	ubiquinol-cytochrome c reductase complex III subunit VII	1.3202	1	1
NDUFA6	NADH:ubiquinone oxidoreductase subunit A6	1.3165	1	1
NDUFB1	NADH:ubiquinone oxidoreductase subunit B1	1.3022	1	1
MRPL34	mitochondrial ribosomal protein L34	1.2918	1	1
MAOB	monoamine oxidase B	1.2901	1	1
TIMM8B	translocase of inner mitochondrial membrane 8 homolog B	1.2741	1	1
TIMM10	translocase of inner mitochondrial membrane 10	1.2497	1	1
COX7A2L	cytochrome c oxidase subunit 7A2 like	1.2474	1	1
ATP5F1B	ATP synthase F1 subunit beta	1.2461	1	1
SDHC	succinate dehydrogenase complex subunit C	1.2371	1	1
NDUFA1	NADH:ubiquinone oxidoreductase subunit A1	1.2360	1	1
ATP1B1	ATPase Na+/K+ transporting subunit beta 1	1.2307	1	1
ATP5F1C	ATP synthase F1 subunit gamma	1.2214	1	1
ACO2	aconitase 2	-1.2130	1	1
PDHB	pyruvate dehydrogenase E1 subunit beta	1.1780	1	1
DLD	dihydrolipoamide dehydrogenase	1.1509	1	1
NDUFV1	NADH:ubiquinone oxidoreductase core subunit V1	-1.1420	1	1
NDUFAB1	NADH:ubiquinone oxidoreductase subunit AB1	1.1149	1	1
MRPS30	mitochondrial ribosomal protein S30	1.1120	1	1
IDH3G	isocitrate dehydrogenase (NAD(+)) 3 non-catalytic subunit ga...	-1.1023	1	1
NDUFB7	NADH:ubiquinone oxidoreductase subunit B7	-1.0929	1	1
TOMM22	translocase of outer mitochondrial membrane 22	1.0800	1	1
ISCA1	iron-sulfur cluster assembly 1	1.0759	1	1
ATP6V1F	ATPase H+ transporting V1 subunit F	1.0451	1	1
ATP5F1A	ATP synthase F1 subunit alpha	1.0396	1	1
UQCRC1	ubiquinol-cytochrome c reductase core protein 1	-1.0165	1	1
COX8A	cytochrome c oxidase subunit 8A	1.0100	1	1
ABCB7	ATP binding cassette subfamily B member 7	0.9920	1	1
NDUFA2	NADH:ubiquinone oxidoreductase subunit A2	0.9817	1	1
ATP5F1D	ATP synthase F1 subunit delta	-0.9748	1	1
TCIRG1	T cell immune regulator 1, ATPase H+ transporting V0 subunit...	0.9739	1	1
PMPCA	peptidase, mitochondrial processing subunit alpha	-0.9734	1	1
TIMM9	translocase of inner mitochondrial membrane 9	0.9630	1	1
ACAA1	acetyl-CoA acyltransferase 1	0.9537	1	1
UQCRB	ubiquinol-cytochrome c reductase binding protein	0.9489	1	1
ACADVL	acyl-CoA dehydrogenase very long chain	-0.9477	1	1
RETSAT	retinol saturase	0.9456	1	1
UQCR11	ubiquinol-cytochrome c reductase, complex III subunit XI	0.9349	1	1
MGST3	microsomal glutathione S-transferase 3	0.9131	1	1
CASP7	caspase 7	0.8973	1	1
NDUFS7	NADH:ubiquinone oxidoreductase core subunit S7	0.8806	1	1
VDAC2	voltage dependent anion channel 2	0.8793	1	1
COX7C	cytochrome c oxidase subunit 7C	0.8791	1	1
NNT	nicotinamide nucleotide transhydrogenase	0.8685	1	1
POR	cytochrome p450 oxidoreductase	-0.8416	1	1
LDHA	lactate dehydrogenase A	0.8291	1	1
CYB5A	cytochrome b5 type A	0.8215	1	1
MTX2	metaxin 2	0.8092	1	1
ATP5PD	ATP synthase peripheral stalk subunit d	0.8015	1	1
MRPS15	mitochondrial ribosomal protein S15	0.7942	1	1
SDHB	succinate dehydrogenase complex iron sulfur subunit B	0.7928	1	1
ETFDH	electron transfer flavoprotein dehydrogenase	-0.7887	1	1
SLC25A6	solute carrier family 25 member 6	0.7851	1	1
MRPS22	mitochondrial ribosomal protein S22	-0.7761	1	1
LDHB	lactate dehydrogenase B	0.7740	1	1
NDUFC2	NADH:ubiquinone oxidoreductase subunit C2	0.7722	1	1
VDAC3	voltage dependent anion channel 3	0.7680	1	1
SDHA	succinate dehydrogenase complex flavoprotein subunit A	0.7505	1	1
SLC25A20	solute carrier family 25 member 20	0.7442	1	1
SLC25A12	solute carrier family 25 member 12	0.7363	1	1
BDH2	3-hydroxybutyrate dehydrogenase 2	0.7244	1	1
ATP5MF	ATP synthase membrane subunit f	0.7141	1	1
DLST	dihydrolipoamide S-succinyltransferase	0.7043	1	1
ATP5ME	ATP synthase membrane subunit e	0.7011	1	1
SUPV3L1	Suv3 like RNA helicase	-0.7005	1	1
MRPS11	mitochondrial ribosomal protein S11	-0.6900	1	1
NDUFS8	NADH:ubiquinone oxidoreductase core subunit S8	-0.6871	1	1
IDH3B	isocitrate dehydrogenase (NAD(+)) 3 non-catalytic subunit be...	-0.6841	1	1
NDUFV2	NADH:ubiquinone oxidoreductase core subunit V2	0.6800	1	1
BAX	BCL2 associated X, apoptosis regulator	0.6746	1	1
MRPL15	mitochondrial ribosomal protein L15	0.6727	1	1
IDH1	isocitrate dehydrogenase (NADP(+)) 1	0.6418	1	1
CPT1A	carnitine palmitoyltransferase 1A	0.6401	1	1
ATP5MC2	ATP synthase membrane subunit c locus 2	0.6279	1	1
CYCS	cytochrome c, somatic	0.6134	1	1
NDUFS4	NADH:ubiquinone oxidoreductase subunit S4	0.6076	1	1
HADHA	hydroxyacyl-CoA dehydrogenase trifunctional multienzyme comp...	-0.6026	1	1
CYB5R3	cytochrome b5 reductase 3	0.6009	1	1
GOT2	glutamic-oxaloacetic transaminase 2	0.5982	1	1
NDUFB8	NADH:ubiquinone oxidoreductase subunit B8	0.5896	1	1
NDUFA5	NADH:ubiquinone oxidoreductase subunit A5	0.5893	1	1
ALAS1	5'-aminolevulinate synthase 1	-0.5818	1	1
HSPA9	heat shock protein family A (Hsp70) member 9	-0.5664	1	1
PDHA1	pyruvate dehydrogenase E1 subunit alpha 1	0.5646	1	1
BCKDHA	branched chain keto acid dehydrogenase E1 subunit alpha	-0.5616	1	1
ATP5PB	ATP synthase peripheral stalk-membrane subunit b	0.5564	1	1
COX6B1	cytochrome c oxidase subunit 6B1	0.5548	1	1
SURF1	SURF1 cytochrome c oxidase assembly factor	0.5381	1	1
NDUFB3	NADH:ubiquinone oxidoreductase subunit B3	0.5325	1	1
NDUFB2	NADH:ubiquinone oxidoreductase subunit B2	0.5264	1	1
GPX4	glutathione peroxidase 4	-0.5239	1	1
ACAT1	acetyl-CoA acetyltransferase 1	0.4733	1	1
ATP5MG	ATP synthase membrane subunit g	0.4725	1	1
UQCRH	ubiquinol-cytochrome c reductase hinge protein	0.4711	1	1
VDAC1	voltage dependent anion channel 1	0.4601	1	1
NDUFB4	NADH:ubiquinone oxidoreductase subunit B4	0.4574	1	1
RHOT1	ras homolog family member T1	0.4485	1	1
ACADM	acyl-CoA dehydrogenase medium chain	-0.4318	1	1
ATP6V0C	ATPase H+ transporting V0 subunit c	-0.4301	1	1
IDH2	isocitrate dehydrogenase (NADP(+)) 2	0.4278	1	1
MFN2	mitofusin 2	-0.4230	1	1
ATP5MC1	ATP synthase membrane subunit c locus 1	0.4059	1	1
TIMM17A	translocase of inner mitochondrial membrane 17A	0.4017	1	1
NDUFA7	NADH:ubiquinone oxidoreductase subunit A7	-0.3999	1	1
ATP5F1E	ATP synthase F1 subunit epsilon	0.3956	1	1
HTRA2	HtrA serine peptidase 2	-0.3850	1	1
PHB2	prohibitin 2	0.3807	1	1
TIMM13	translocase of inner mitochondrial membrane 13	-0.3797	1	1
DLAT	dihydrolipoamide S-acetyltransferase	0.3643	1	1
RHOT2	ras homolog family member T2	0.3640	1	1
IDH3A	isocitrate dehydrogenase (NAD(+)) 3 catalytic subunit alpha	0.3500	1	1
OXA1L	OXA1L mitochondrial inner membrane protein	0.3455	1	1
MRPL35	mitochondrial ribosomal protein L35	-0.3371	1	1
MDH2	malate dehydrogenase 2	0.3126	1	1
POLR2F	RNA polymerase II, I and III subunit F	0.3091	1	1
COX4I1	cytochrome c oxidase subunit 4I1	0.2944	1	1
ATP6V1D	ATPase H+ transporting V1 subunit D	0.2907	1	1
ATP6V1E1	ATPase H+ transporting V1 subunit E1	0.2857	1	1
SUCLG1	succinate-CoA ligase GDP/ADP-forming subunit alpha	-0.2838	1	1
IMMT	inner membrane mitochondrial protein	-0.2776	1	1
ETFA	electron transfer flavoprotein subunit alpha	0.2656	1	1
TIMM50	translocase of inner mitochondrial membrane 50	-0.2560	1	1
DECR1	2,4-dienoyl-CoA reductase 1	0.2490	1	1
SUCLA2	succinate-CoA ligase ADP-forming subunit beta	-0.2481	1	1
ACADSB	acyl-CoA dehydrogenase short/branched chain	0.2409	1	1
NDUFS1	NADH:ubiquinone oxidoreductase core subunit S1	0.2392	1	1
ATP6V1H	ATPase H+ transporting V1 subunit H	-0.2257	1	1
NDUFA9	NADH:ubiquinone oxidoreductase subunit A9	0.2238	1	1
NDUFA3	NADH:ubiquinone oxidoreductase subunit A3	-0.2216	1	1
NDUFS6	NADH:ubiquinone oxidoreductase subunit S6	-0.2155	1	1
HSD17B10	hydroxysteroid 17-beta dehydrogenase 10	0.2058	1	1
ECH1	enoyl-CoA hydratase 1	-0.2025	1	1
MRPS12	mitochondrial ribosomal protein S12	-0.1950	1	1
LRPPRC	leucine rich pentatricopeptide repeat containing	0.1873	1	1
ALDH6A1	aldehyde dehydrogenase 6 family member A1	0.1710	1	1
PRDX3	peroxiredoxin 3	0.1196	1	1
ETFB	electron transfer flavoprotein subunit beta	-0.1057	1	1
PDP1	pyruvate dehydrogenase phosphatase catalytic subunit 1	-0.0635	1	1
MPC1	mitochondrial pyruvate carrier 1	0.0587	1	1
FXN	frataxin	-0.0428	1	1
MTRF1	mitochondrial translation release factor 1	-0.0424	1	1
AFG3L2	AFG3 like matrix AAA peptidase subunit 2	-0.0390	1	1
COX5B	cytochrome c oxidase subunit 5B	0.0160	1	1
