# Supplementary material for: Functional and Transcriptional Effects of a Hydrogen Sulfide Donor on the Intestinal Epithelial Barrier
Source: Research Square preprint supplement (doi:10.21203/rs.3.rs-7324506/v1), 2025-09-27
Supplement: Supplementary file 3 [file 55921be3e0b5449e66f27e90.xlsx]

## Sheet: Sheet 1
feature	symbol	human_ortholog	gene_name	gene_title	chr	logFC	AveExpr0	AveExpr1	meta.q	ttest.q
FTH1P3	FTH1P3	FTH1P3	FTH1P3	ferritin heavy chain 1 pseudogene 3	2p23.3	2.822	0.5759	3.3981	1	1
GOLGA8CP	GOLGA8CP	GOLGA8CP	GOLGA8CP	golgin A8 family member C, pseudogene	15q11.2	-2.703	5.5808	2.8776	1	1
GOLGA8Q	GOLGA8Q	GOLGA8Q	GOLGA8Q	golgin A8 family member Q	15q13.2	-2.659	5.6164	2.9571	1	1
RPL10P4	RPL10P4	RPL10P4	RPL10P4	ribosomal protein L10 pseudogene 4	1q32.1	2.603	0.9609	3.5641	1	1
FTH1P7	FTH1P7	FTH1P7	FTH1P7	ferritin heavy chain 1 pseudogene 7	13q12.12	2.597	1.7540	4.3512	1	1
SNRPGP9	SNRPGP9	SNRPGP9	SNRPGP9	small nuclear ribonucleoprotein polypeptide G pseu...	2q13	2.566	0.3445	2.9105	1	1
PNMA1	PNMA1	PNMA1	PNMA1	PNMA family member 1	14q24.3	2.533	0.3445	2.8776	1	1
RPL21P129	RPL21P129	RPL21P129	RPL21P129	ribosomal protein L21 pseudogene 129	19p13.2	2.463	2.7231	5.1862	1	1
LINC00857	LINC00857	LINC00857	LINC00857	long intergenic non-protein coding RNA 857	10q22.3	2.443	1.3240	3.7672	1	1
RPL39P15	RPL39P15	RPL39P15	RPL39P15	ribosomal protein L39 pseudogene 15	2p13.3	2.429	2.9680	5.3970	1	1
RPL10P12	RPL10P12	RPL10P12	RPL10P12	ribosomal protein L10 pseudogene 12	12q15	2.410	0.7080	3.1178	1	1
RPLP0P4	RPLP0P4	RPLP0P4	RPLP0P4	ribosomal protein lateral stalk subunit P0 pseudog...	1q21.3	2.401	0.3445	2.7455	1	1
PPIAP16	PPIAP16	PPIAP16	PPIAP16	peptidylprolyl isomerase A pseudogene 16	3p14.3	2.377	0.8509	3.2275	1	1
PRB1	PRB1	PRB1	PRB1	proline rich protein BstNI subfamily 1	12p13.2	-2.366	3.6898	1.3240	1	1
RPL36AP46	RPL36AP46	RPL36AP46	RPL36AP46	ribosomal protein L36a pseudogene 46	17q23.2	2.322	0.1380	2.4602	1	1
CDKN2A	CDKN2A	CDKN2A	CDKN2A	cyclin dependent kinase inhibitor 2A	9p21.3	2.318	0.8509	3.1690	1	1
SNRPGP2	SNRPGP2	SNRPGP2	SNRPGP2	small nuclear ribonucleoprotein polypeptide G pseu...	18q21.2	2.307	1.3240	3.6308	1	1
RPL21P67	RPL21P67	RPL21P67	RPL21P67	ribosomal protein L21 pseudogene 67	6q23.2	2.256	1.5114	3.7672	1	1
SRGAP2D	SRGAP2D	SRGAP2D	SRGAP2D	SLIT-ROBO Rho GTPase activating protein 2D (pseudo...	1q21.1	-2.235	3.3665	1.1314	1	1
RPL9P28	RPL9P28	RPL9P28	RPL9P28	ribosomal protein L9 pseudogene 28	17q21.32	2.209	4.5161	6.7250	1	1
FTH1P5	FTH1P5	FTH1P5	FTH1P5	ferritin heavy chain 1 pseudogene 5	6p12.3	2.199	1.5951	3.7936	1	1
TAF9BP1	TAF9BP1	TAF9BP1	TAF9BP1	TATA-box binding protein associated factor 9b pseu...	3p24.2	2.181	0.3445	2.5260	1	1
RPLP0P6	RPLP0P6	RPLP0P6	RPLP0P6	ribosomal protein lateral stalk subunit P0 pseudog...	2p22.1	2.166	7.6248	9.7903	1	1
RPS29P16	RPS29P16	RPS29P16	RPS29P16	ribosomal protein S29 pseudogene 16	7q22.1	2.145	2.7231	4.8683	1	1
NDUFA4	NDUFA4	NDUFA4	NDUFA4	NDUFA4 mitochondrial complex associated	7p21.3	2.138	3.6735	5.8116	1	1
RPS28P4	RPS28P4	RPS28P4	RPS28P4	ribosomal protein S28 pseudogene 4	2q37.1	2.137	6.2743	8.4108	1	1
SNRPGP10	SNRPGP10	SNRPGP10	SNRPGP10	small nuclear ribonucleoprotein polypeptide G pseu...	1q32.1	2.131	0.0000	2.1312	1	1
SLC22A7	SLC22A7	SLC22A7	SLC22A7	solute carrier family 22 member 7	6p21.1	-2.131	3.2623	1.1314	1	1
RPLP0P9	RPLP0P9	RPLP0P9	RPLP0P9	ribosomal protein lateral stalk subunit P0 pseudog...	5q34	2.129	7.7128	9.8419	1	1
SOX5	SOX5	SOX5	SOX5	SRY-box transcription factor 5	12p12.1	-2.120	3.6505	1.5309	1	1
FTH1P23	FTH1P23	FTH1P23	FTH1P23	ferritin heavy chain 1 pseudogene 23	3p13	2.118	2.0834	4.2013	1	1
RPS3AP44	RPS3AP44	RPS3AP44	RPS3AP44	RPS3A pseudogene 44	13q12.13	2.110	2.0339	4.1438	1	1
RPS3AP5	RPS3AP5	RPS3AP5	RPS3AP5	RPS3A pseudogene 5	10q23.1	2.104	4.4904	6.5948	1	1
RPS20P12	RPS20P12	RPS20P12	RPS20P12	ribosomal protein S20 pseudogene 12	2q37.1	2.083	0.0000	2.0834	1	1
GAPDHP35	GAPDHP35	GAPDHP35	GAPDHP35	glyceraldehyde 3 phosphate dehydrogenase pseudogen...	16p12.1	2.078	0.3445	2.4220	1	1
RPL9P18	RPL9P18	RPL9P18	RPL9P18	ribosomal protein L9 pseudogene 18	6q12	2.074	3.0293	5.1037	1	1
SNRPGP15	SNRPGP15	SNRPGP15	SNRPGP15	small nuclear ribonucleoprotein polypeptide G pseu...	19p13.12	2.067	0.1380	2.2055	1	1
SLC2A3P2	SLC2A3P2	SLC2A3P2	SLC2A3P2	solute carrier family 2 member 3 pseudogene 2	1p31.3	-2.054	2.6298	0.5759	1	1
RPS28P7	RPS28P7	RPS28P7	RPS28P7	ribosomal protein S28 pseudogene 7	11q14.1	2.050	6.5347	8.5851	1	1
RPL39P3	RPL39P3	RPL39P3	RPL39P3	ribosomal protein L39 pseudogene 3	6q13	2.049	5.3537	7.4030	1	1
CST4	CST4	CST4	CST4	cystatin S	20p11.21	-2.043	2.3587	0.3153	1	1
COX5A	COX5A	COX5A	COX5A	cytochrome c oxidase subunit 5A	15q24.2	2.024	4.0867	6.1107	1	1
FOXP1-DT	FOXP1-DT	FOXP1-DT	FOXP1-DT	FOXP1 divergent transcript	3p13	2.022	0.1380	2.1600	1	1
SEPTIN7P3	SEPTIN7P3	SEPTIN7P3	SEPTIN7P3	septin 7 pseudogene 3	7p14.2	-2.015	5.1839	3.1690	1	1
RNY4P16	RNY4P16	RNY4P16	RNY4P16	RNY4 pseudogene 16	1q42.3	-2.014	2.5897	0.5759	1	1
FTLP3	FTLP3	FTLP3	FTLP3	ferritin light chain pseudogene 3	20p13	2.008	1.9060	3.9136	1	1
