# Supplementary material for: Functional and Transcriptional Effects of a Hydrogen Sulfide Donor on the Intestinal Epithelial Barrier
Source: Research Square preprint supplement (doi:10.21203/rs.3.rs-7324506/v1), 2025-09-27
Supplement: Supplementary file 5 [file 584fa4b4f913d7321646e98d.xlsx]

## Sheet: Sheet 1
feature	symbol	human_ortholog	gene_name	gene_title	chr	logFC	AveExpr0	AveExpr1	meta.q	ttest.q
EIF1P5	EIF1P5	EIF1P5	EIF1P5	eukaryotic translation initiation factor 1 pseudog...	17p11.2	4.314	1.7069	6.0206	1	1
HERC2P4	HERC2P4	HERC2P4	HERC2P4	HERC2 pseudogene 4	16p11.2	-3.553	4.1286	0.5759	1	1
RPS27AP1	RPS27AP1	RPS27AP1	RPS27AP1	RPS27A pseudogene 1	17p13.1	3.434	0.3153	3.7491	1	1
FTH1P8	FTH1P8	FTH1P8	FTH1P8	ferritin heavy chain 1 pseudogene 8	Xq28	3.425	1.7802	5.2048	1	1
CEACAM6	CEACAM6	CEACAM6	CEACAM6	CEA cell adhesion molecule 6	19q13.2	3.389	0.4301	3.8190	1	1
RPS27AP11	RPS27AP11	RPS27AP11	RPS27AP11	RPS27A pseudogene 11	6q21	3.374	2.1402	5.5145	1	1
RPS3AP5	RPS3AP5	RPS3AP5	RPS3AP5	RPS3A pseudogene 5	10q23.1	3.367	4.5268	7.8935	1	1
EID3	EID3	EID3	EID3	EP300 interacting inhibitor of differentiation 3	12q23.3	-3.361	3.6279	0.2672	1	1
HSF2	HSF2	HSF2	HSF2	heat shock transcription factor 2	6q22.31	3.338	1.5652	4.9030	1	1
IER5	IER5	IER5	IER5	immediate early response 5	1q25.3	3.314	1.6617	4.9752	1	1
PLBD1	PLBD1	PLBD1	PLBD1	phospholipase B domain containing 1	12p13.1	3.259	0.3153	3.5746	1	1
RPS6P22	RPS6P22	RPS6P22	RPS6P22	ribosomal protein S6 pseudogene 22	12q14.1	-3.249	4.6527	1.4040	1	1
LONRF3	LONRF3	LONRF3	LONRF3	LON peptidase N-terminal domain and ring finger 3	Xq24	-3.248	4.9549	1.7069	1	1
RPL36AP21	RPL36AP21	RPL36AP21	RPL36AP21	ribosomal protein L36a pseudogene 21	5p15.1	3.181	1.6617	4.8426	1	1
SNAPIN	SNAPIN	SNAPIN	SNAPIN	SNAP associated protein	1q21.3	3.173	0.5759	3.7491	1	1
UGT1A4	UGT1A4	UGT1A4	UGT1A4	UDP glucuronosyltransferase family 1 member A4	2q37.1	-3.171	3.3087	0.1380	1	1
KRT10	KRT10	KRT10	KRT10	keratin 10	17q21.2	3.170	1.5652	4.7352	1	1
SNRPGP15	SNRPGP15	SNRPGP15	SNRPGP15	small nuclear ribonucleoprotein polypeptide G pseu...	19p13.12	3.159	0.0000	3.1586	1	1
RPL10P4	RPL10P4	RPL10P4	RPL10P4	ribosomal protein L10 pseudogene 4	1q32.1	3.131	0.4301	3.5610	1	1
SRF	SRF	SRF	SRF	serum response factor	6p21.1	3.099	1.9600	5.0592	1	1
EDC4	EDC4	EDC4	EDC4	enhancer of mRNA decapping 4	16q22.1	-3.096	3.9778	0.8822	1	1
CCDC183-AS1	CCDC183-AS1	CCDC183-AS1	CCDC183-AS1	CCDC183 antisense RNA 1	9q34.3	-3.094	3.6702	0.5759	1	1
RPL23AP18	RPL23AP18	RPL23AP18	RPL23AP18	ribosomal protein L23a pseudogene 18	1q32.3	3.088	1.5652	4.6527	1	1
TEX30	TEX30	TEX30	TEX30	testis expressed 30	13q33.1	3.033	0.0000	3.0329	1	1
SNORD89	SNORD89	SNORD89	SNORD89	small nucleolar RNA, C/D box 89	2q11.2	-3.030	4.7844	1.7540	1	1
RPS3AP25	RPS3AP25	RPS3AP25	RPS3AP25	RPS3A pseudogene 25	7q21.3	3.029	3.4481	6.4775	1	1
C18orf21	C18orf21	C18orf21	C18orf21	chromosome 18 open reading frame 21	18q12.2	3.021	0.0000	3.0208	1	1
RNF185	RNF185	RNF185	RNF185	ring finger protein 185	22q12.2	3.001	0.7080	3.7086	1	1
NAV2-AS5	NAV2-AS5	NAV2-AS5	NAV2-AS5	NAV2 antisense RNA 5	11p15.1	-2.983	3.5590	0.5759	1	1
RPL23AP69	RPL23AP69	RPL23AP69	RPL23AP69	ribosomal protein L23a pseudogene 69	13q12.13	2.965	0.7080	3.6735	1	1
RNA5-8SN3	RNA5-8SN3	RNA5-8SN3	RNA5-8SN3	RNA, 5.8S ribosomal N3	21p11.2	-2.964	6.1534	3.1893	1	1
5_8S_rRNA	5_8S_rRNA	5_8S_rRNA	5_8S_rRNA	NA	NA	-2.956	7.6551	4.6995	1	1
PITHD1	PITHD1	PITHD1	PITHD1	PITH domain containing 1	1p36.11	2.945	1.5652	4.5097	1	1
DEFB1	DEFB1	DEFB1	DEFB1	defensin beta 1	8p23.1	2.939	0.5759	3.5148	1	1
FTLP2	FTLP2	FTLP2	FTLP2	ferritin light chain pseudogene 2	Xp21.2	2.932	2.8801	5.8121	1	1
OST4	OST4	OST4	OST4	oligosaccharyltransferase complex subunit 4, non-c...	2p23.3	2.919	0.9609	3.8800	1	1
MIR1244-4	MIR1244-4	MIR1244-4	MIR1244-4	microRNA 1244-4	12p13.2	2.918	5.1387	8.0569	1	1
LANCL1	LANCL1	LANCL1	LANCL1	LanC like glutathione S-transferase 1	2q34	2.911	1.1314	4.0422	1	1
RNA5SP195	RNA5SP195	RNA5SP195	RNA5SP195	RNA, 5S ribosomal pseudogene 195	5q31.2	-2.882	3.8431	0.9609	1	1
GOLGA8Q	GOLGA8Q	GOLGA8Q	GOLGA8Q	golgin A8 family member Q	15q13.2	-2.879	5.3912	2.5125	1	1
ADCY6	ADCY6	ADCY6	ADCY6	adenylate cyclase 6	12q13.12	-2.876	7.3146	4.4389	1	1
RPL15P14	RPL15P14	RPL15P14	RPL15P14	ribosomal protein L15 pseudogene 14	10q22.1	2.871	2.0834	4.9549	1	1
RNA5-8SN4	RNA5-8SN4	RNA5-8SN4	RNA5-8SN4	RNA, 5.8S ribosomal N4	NA	-2.862	6.1493	3.2875	1	1
LRR1	LRR1	LRR1	LRR1	leucine rich repeat protein 1	14q21.3	2.860	1.0341	3.8941	1	1
SNRPGP9	SNRPGP9	SNRPGP9	SNRPGP9	small nuclear ribonucleoprotein polypeptide G pseu...	2q13	2.857	0.4301	3.2875	1	1
CTNNA1P1	CTNNA1P1	CTNNA1P1	CTNNA1P1	catenin alpha 1 pseudogene 1	5q22.3	-2.845	3.7272	0.8822	1	1
RPS14P8	RPS14P8	RPS14P8	RPS14P8	ribosomal protein S14 pseudogene 8	5q23.1	-2.843	4.8767	2.0339	1	1
GOLGA8VP	GOLGA8VP	GOLGA8VP	GOLGA8VP	golgin A8 family member V, pseudogene	15q26.3	2.837	0.0000	2.8371	1	1
EIF3FP3	EIF3FP3	EIF3FP3	EIF3FP3	eukaryotic translation initiation factor 3 subunit...	2p16.1	2.833	3.7733	6.6059	1	1
MPRIPP1	MPRIPP1	MPRIPP1	MPRIPP1	myosin phosphatase Rho interacting protein pseudog...	3p21.31	-2.820	4.1438	1.3240	1	1
MYH14	MYH14	MYH14	MYH14	myosin heavy chain 14	19q13.33	-2.814	7.2293	4.4156	1	1
SHANK2-AS2	SHANK2-AS2	SHANK2-AS2	SHANK2-AS2	SHANK2 antisense RNA 2	11q13.4	-2.812	3.7733	0.9609	1	1
DYNLL1P2	DYNLL1P2	DYNLL1P2	DYNLL1P2	dynein light chain LC8-type 1 pseudogene 2	14q31.1	2.808	0.0000	2.8078	1	1
SUDS3P1	SUDS3P1	SUDS3P1	SUDS3P1	SDS3 homolog, SIN3A corepressor complex component ...	5q35.3	-2.807	6.0697	3.2623	1	1
MIR1244-2	MIR1244-2	MIR1244-2	MIR1244-2	microRNA 1244-2	5q23.1	2.805	5.3689	8.1744	1	1
GCSHP5	GCSHP5	GCSHP5	GCSHP5	GCSH pseudogene 5	1q24.2	2.802	0.8288	3.6308	1	1
RPL9P18	RPL9P18	RPL9P18	RPL9P18	ribosomal protein L9 pseudogene 18	6q12	2.799	3.0893	5.8881	1	1
RPL36AP26	RPL36AP26	RPL36AP26	RPL36AP26	ribosomal protein L36a pseudogene 26	7p21.2	2.784	1.2224	4.0063	1	1
RNA5-8SN5	RNA5-8SN5	RNA5-8SN5	RNA5-8SN5	RNA, 5.8S ribosomal N5	NA	-2.776	6.0847	3.3087	1	1
RPL15P2	RPL15P2	RPL15P2	RPL15P2	ribosomal protein L15 pseudogene 2	14q32.13	2.749	3.0247	5.7742	1	1
TRMT112P6	TRMT112P6	TRMT112P6	TRMT112P6	tRNA methyltransferase subunit 11-2 pseudogene 6	2p23.3	2.732	0.8288	3.5610	1	1
SRI	SRI	SRI	SRI	sorcin	7q21.12	2.728	2.1402	4.8683	1	1
TACSTD2	TACSTD2	TACSTD2	TACSTD2	tumor associated calcium signal transducer 2	1p32.1	2.713	0.9609	3.6735	1	1
SMCO4	SMCO4	SMCO4	SMCO4	single-pass membrane protein with coiled-coil doma...	11q21	2.710	1.7802	4.4904	1	1
RAB9A	RAB9A	RAB9A	RAB9A	RAB9A, member RAS oncogene family	Xp22.2	2.706	0.3153	3.0208	1	1
PIWIL4	PIWIL4	PIWIL4	PIWIL4	piwi like RNA-mediated gene silencing 4	11q21	2.700	1.1314	3.8318	1	1
IPMK	IPMK	IPMK	IPMK	inositol polyphosphate multikinase	10q21.1	2.696	2.5897	5.2861	1	1
RNA5-8SN2	RNA5-8SN2	RNA5-8SN2	RNA5-8SN2	RNA, 5.8S ribosomal N2	21p11.2	-2.693	6.0914	3.3981	1	1
LINC02428	LINC02428	LINC02428	LINC02428	long intergenic non-protein coding RNA 2428	4q24	2.691	0.0000	2.6914	1	1
HYOU1	HYOU1	HYOU1	HYOU1	hypoxia up-regulated 1	11q23.3	-2.691	4.7950	2.1040	1	1
CEP295NL	CEP295NL	CEP295NL	CEP295NL	CEP295 N-terminal like	17q25.3	-2.688	4.5268	1.8390	1	1
RPL39P3	RPL39P3	RPL39P3	RPL39P3	ribosomal protein L39 pseudogene 3	6q13	2.677	5.3189	7.9961	1	1
RNA5-8SN1	RNA5-8SN1	RNA5-8SN1	RNA5-8SN1	RNA, 5.8S ribosomal N1	21p11.2	-2.671	6.1194	3.4481	1	1
MIR1244-3	MIR1244-3	MIR1244-3	MIR1244-3	microRNA 1244-3	12p13.31	2.658	4.7163	7.3742	1	1
SAR1AP3	SAR1AP3	SAR1AP3	SAR1AP3	secretion associated Ras related GTPase 1A pseudog...	4q27	2.653	0.0000	2.6530	1	1
SNHG6	SNHG6	SNHG6	SNHG6	small nucleolar RNA host gene 6	8q13.1	2.652	4.9466	7.5981	1	1
HPN-AS1	HPN-AS1	HPN-AS1	HPN-AS1	HPN antisense RNA 1	19q13.11-q13.12	-2.648	5.2376	2.5897	1	1
CDC23	CDC23	CDC23	CDC23	cell division cycle 23	5q31.2	2.646	2.2055	4.8511	1	1
GABARAPL3	GABARAPL3	GABARAPL3	GABARAPL3	GABA type A receptor associated protein like 3 (ps...	15q26.1	2.645	2.3587	5.0036	1	1
RPL12P35	RPL12P35	RPL12P35	RPL12P35	ribosomal protein L12 pseudogene 35	15q23	2.642	1.4796	4.1216	1	1
RPL21P11	RPL21P11	RPL21P11	RPL21P11	ribosomal protein L21 pseudogene 11	14q32.11	2.641	5.2144	7.8553	1	1
AKAP8L	AKAP8L	AKAP8L	AKAP8L	A-kinase anchoring protein 8 like	19p13.12	-2.636	7.2564	4.6202	1	1
CHPF2	CHPF2	CHPF2	CHPF2	chondroitin polymerizing factor 2	7q36.1	2.633	1.0341	3.6670	1	1
CDH6	CDH6	CDH6	CDH6	cadherin 6	5p13.3	2.633	1.0341	3.6670	1	1
DKK 1.00	DKK 1.00	DKK 1.00	DKK 1.00	NA	NA	2.621	1.4796	4.1010	1	1
TIMM8BP2	TIMM8BP2	TIMM8BP2	TIMM8BP2	translocase of inner mitochondrial membrane 8B pse...	Xq26.2	2.619	0.8288	3.4481	1	1
SPCS2P1	SPCS2P1	SPCS2P1	SPCS2P1	signal peptidase complex subunit 2 pseudogene 1	15q15.2	2.615	0.3153	2.9301	1	1
FTH1P23	FTH1P23	FTH1P23	FTH1P23	ferritin heavy chain 1 pseudogene 23	3p13	2.610	1.9060	4.5161	1	1
RPL36AP46	RPL36AP46	RPL36AP46	RPL36AP46	ribosomal protein L36a pseudogene 46	17q23.2	2.606	0.0000	2.6056	1	1
ARPC3P3	ARPC3P3	ARPC3P3	ARPC3P3	actin related protein 2/3 complex subunit 3 pseudo...	11q21	2.606	0.0000	2.6056	1	1
RPL6P25	RPL6P25	RPL6P25	RPL6P25	ribosomal protein L6 pseudogene 25	12q21.31	2.598	3.3701	5.9685	1	1
HOXC-AS1	HOXC-AS1	HOXC-AS1	HOXC-AS1	HOXC cluster antisense RNA 1	12q13.13	-2.596	3.7272	1.1314	1	1
JUNB	JUNB	JUNB	JUNB	JunB proto-oncogene, AP-1 transcription factor sub...	19p13.13	2.595	0.3153	2.9105	1	1
NDEL1	NDEL1	NDEL1	NDEL1	nudE neurodevelopment protein 1 like 1	17p13.1	2.588	2.1402	4.7279	1	1
PRRC2B	PRRC2B	PRRC2B	PRRC2B	proline rich coiled-coil 2B	9q34.13	-2.588	6.0281	3.4404	1	1
SLC41A3	SLC41A3	SLC41A3	SLC41A3	solute carrier family 41 member 3	3q21.2-q21.3	2.585	1.0341	3.6190	1	1
SLC25A38	SLC25A38	SLC25A38	SLC25A38	solute carrier family 25 member 38	3p22.1	2.584	1.9060	4.4904	1	1
RPL39P15	RPL39P15	RPL39P15	RPL39P15	ribosomal protein L39 pseudogene 15	2p13.3	2.578	3.5148	6.0930	1	1
RPL17P26	RPL17P26	RPL17P26	RPL17P26	ribosomal protein L17 pseudogene 26	6p12.1	2.570	1.3240	3.8941	1	1
CALM1P1	CALM1P1	CALM1P1	CALM1P1	calmodulin 1 pseudogene 1	Xq21.33	2.570	0.5759	3.1457	1	1
RPL36AP28	RPL36AP28	RPL36AP28	RPL36AP28	ribosomal protein L36a pseudogene 28	7q36.1	2.566	3.0545	5.6207	1	1
DLGAP4-AS1	DLGAP4-AS1	DLGAP4-AS1	DLGAP4-AS1	DLGAP4 antisense RNA 1	20q11.23	-2.566	3.4481	0.8822	1	1
INCENP	INCENP	INCENP	INCENP	inner centromere protein	11q12.3	-2.565	6.5561	3.9910	1	1
B9D2	B9D2	B9D2	B9D2	B9 domain containing 2	19q13.2	2.565	0.0000	2.5647	1	1
FAM83D	FAM83D	FAM83D	FAM83D	family with sequence similarity 83 member D	20q11.23	2.564	2.0339	4.5975	1	1
CTAGE15	CTAGE15	CTAGE15	CTAGE15	CTAGE family member 15	7q35	-2.563	4.2249	1.6617	1	1
RPL23AP55	RPL23AP55	RPL23AP55	RPL23AP55	ribosomal protein L23a pseudogene 55	8p21.3	2.563	1.4040	3.9665	1	1
TEX19	TEX19	TEX19	TEX19	testis expressed 19	17q25.3	2.561	0.8288	3.3901	1	1
GOLGA8CP	GOLGA8CP	GOLGA8CP	GOLGA8CP	golgin A8 family member C, pseudogene	15q11.2	-2.560	5.1655	2.6056	1	1
RPL39P5	RPL39P5	RPL39P5	RPL39P5	ribosomal protein L39 pseudogene 5	3q22.2	2.556	1.3240	3.8800	1	1
COPG2	COPG2	COPG2	COPG2	COPI coat complex subunit gamma 2	7q32.2	-2.554	3.5148	0.9609	1	1
RPL10P12	RPL10P12	RPL10P12	RPL10P12	ribosomal protein L10 pseudogene 12	12q15	2.553	0.5759	3.1291	1	1
HSPA5P1	HSPA5P1	HSPA5P1	HSPA5P1	HSPA5 pseudogene 1	1p34.3	-2.548	6.5722	4.0244	1	1
COX5A	COX5A	COX5A	COX5A	cytochrome c oxidase subunit 5A	15q24.2	2.547	4.2989	6.8457	1	1
TTN	TTN	TTN	TTN	titin	2q31.2	-2.543	10.0046	7.4614	1	1
IL1A	IL1A	IL1A	IL1A	interleukin 1 alpha	2q14.1	-2.543	3.3087	0.7658	1	1
PREB	PREB	PREB	PREB	prolactin regulatory element binding	2p23.3	2.540	2.8801	5.4206	1	1
INHBC	INHBC	INHBC	INHBC	inhibin subunit beta C	12q13.3	-2.540	2.5400	0.0000	1	1
ACOX2	ACOX2	ACOX2	ACOX2	acyl-CoA oxidase 2	3p14.3	2.540	0.0000	2.5400	1	1
EPOR	EPOR	EPOR	EPOR	erythropoietin receptor	19p13.2	2.540	0.0000	2.5400	1	1
RPL39P38	RPL39P38	RPL39P38	RPL39P38	ribosomal protein L39 pseudogene 38	19p13.11	2.537	4.7571	7.2943	1	1
RPL9P28	RPL9P28	RPL9P28	RPL9P28	ribosomal protein L9 pseudogene 28	17q21.32	2.535	4.6781	7.2129	1	1
RPL21P131	RPL21P131	RPL21P131	RPL21P131	ribosomal protein L21 pseudogene 131	19q13.11	2.532	2.1402	4.6724	1	1
PCSK9	PCSK9	PCSK9	PCSK9	proprotein convertase subtilisin/kexin type 9	1p32.3	2.530	1.9600	4.4904	1	1
RPL23AP2	RPL23AP2	RPL23AP2	RPL23AP2	ribosomal protein L23a pseudogene 2	19p13.12	2.530	2.2055	4.7352	1	1
SMIM30	SMIM30	SMIM30	SMIM30	small integral membrane protein 30	7q31.1	2.526	1.4040	3.9297	1	1
RPS29P11	RPS29P11	RPS29P11	RPS29P11	ribosomal protein S29 pseudogene 11	4p15.2	2.526	1.5652	4.0907	1	1
RPL24P4	RPL24P4	RPL24P4	RPL24P4	RPL24 pseudogene 4	6p21.1	2.525	3.8086	6.3340	1	1
HSPB8	HSPB8	HSPB8	HSPB8	heat shock protein family B (small) member 8	12q24.23	2.522	2.8801	5.4020	1	1
RPL23AP12	RPL23AP12	RPL23AP12	RPL23AP12	ribosomal protein L23a pseudogene 12	21q22.2	2.515	3.0247	5.5401	1	1
FAM89A	FAM89A	FAM89A	FAM89A	family with sequence similarity 89 member A	1q42.2	2.515	1.0341	3.5486	1	1
PRR13P5	PRR13P5	PRR13P5	PRR13P5	proline rich 13 pseudogene 5	19q13.2	-2.512	5.8456	3.3331	1	1
PA2G4P5	PA2G4P5	PA2G4P5	PA2G4P5	proliferation-associated 2G4 pseudogene 5	6q21	-2.510	5.1161	2.6056	1	1
RPL6P13	RPL6P13	RPL6P13	RPL6P13	ribosomal protein L6 pseudogene 13	4q21.3	2.509	4.3116	6.8202	1	1
ZNF670	ZNF670	ZNF670	ZNF670	zinc finger protein 670	1q44	2.500	0.4301	2.9301	1	1
RPS7P10	RPS7P10	RPS7P10	RPS7P10	ribosomal protein S7 pseudogene 10	13q12.11	2.499	4.7376	7.2364	1	1
UQCRBP1	UQCRBP1	UQCRBP1	UQCRBP1	ubiquinol-cytochrome c reductase binding protein p...	Xp11.21	2.498	2.6988	5.1968	1	1
COX6A1P2	COX6A1P2	COX6A1P2	COX6A1P2	COX6A1 pseudogene 2	6p21.2	2.498	1.7069	4.2047	1	1
TBX4	TBX4	TBX4	TBX4	T-box transcription factor 4	17q23.2	2.497	0.0000	2.4973	1	1
SELENOF	SELENOF	SELENOF	SELENOF	selenoprotein F	1p22.3	2.495	2.8801	5.3748	1	1
UBBP4	UBBP4	UBBP4	UBBP4	ubiquitin B pseudogene 4	17p11.2	2.494	3.3981	5.8922	1	1
FH	FH	FH	FH	fumarate hydratase	1q43	2.490	3.0545	5.5448	1	1
DEPDC1	DEPDC1	DEPDC1	DEPDC1	DEP domain containing 1	1p31.3	2.488	1.1314	3.6190	1	1
HSPA1B	HSPA1B	HSPA1B	HSPA1B	heat shock protein family A (Hsp70) member 1B	6p21.33	2.488	1.1314	3.6190	1	1
EEF1A1P3	EEF1A1P3	EEF1A1P3	EEF1A1P3	eukaryotic translation elongation factor 1 alpha 1...	13q12.2	2.479	0.3153	2.7940	1	1
RPL21P120	RPL21P120	RPL21P120	RPL21P120	ribosomal protein L21 pseudogene 120	17p11.2	2.478	6.0595	8.5378	1	1
RPL36AP45	RPL36AP45	RPL36AP45	RPL36AP45	ribosomal protein L36a pseudogene 45	15q24.2	2.477	2.2055	4.6820	1	1
FAM192BP	FAM192BP	FAM192BP	FAM192BP	family with sequence similarity 192, member A pseu...	4q31.3	-2.469	5.7569	3.2875	1	1
FAM200B	FAM200B	FAM200B	FAM200B	family with sequence similarity 200 member B	4p15.32	2.462	0.9609	3.4233	1	1
AGAP7P	AGAP7P	AGAP7P	AGAP7P	ArfGAP with GTPase domain, ankyrin repeat and PH d...	10q11.22	-2.461	5.8514	3.3901	1	1
SINHCAFP1	SINHCAFP1	SINHCAFP1	SINHCAFP1	SINHCAF pseudogene 1	18q11.2	-2.461	4.0744	1.6135	1	1
RPL32P13	RPL32P13	RPL32P13	RPL32P13	ribosomal protein L32 pseudogene 13	4q25	2.460	0.0000	2.4602	1	1
SLC7A7	SLC7A7	SLC7A7	SLC7A7	solute carrier family 7 member 7	14q11.2	2.460	6.3543	8.8142	1	1
NBPF26	NBPF26	NBPF26	NBPF26	NBPF member 26	1p11.2	-2.460	11.9384	9.4785	1	1
NPM3	NPM3	NPM3	NPM3	nucleophosmin/nucleoplasmin 3	10q24.32	2.460	1.6617	4.1216	1	1
FLJ42393	FLJ42393	FLJ42393	FLJ42393	uncharacterized LOC401105	3q27.3	-2.459	4.0244	1.5652	1	1
PPIL1	PPIL1	PPIL1	PPIL1	peptidylprolyl isomerase like 1	6p21.2	2.450	1.1314	3.5816	1	1
GOLPH3	GOLPH3	GOLPH3	GOLPH3	golgi phosphoprotein 3	5p13.3	2.449	4.4389	6.8881	1	1
SLC35B2	SLC35B2	SLC35B2	SLC35B2	solute carrier family 35 member B2	6p21.1	2.448	0.4301	2.8776	1	1
H2AZ1	H2AZ1	H2AZ1	H2AZ1	H2A.Z variant histone 1	4q23	2.445	4.5854	7.0303	1	1
FTH1P20	FTH1P20	FTH1P20	FTH1P20	ferritin heavy chain 1 pseudogene 20	2q31.3	2.444	2.4973	4.9414	1	1
RPL23AP74	RPL23AP74	RPL23AP74	RPL23AP74	ribosomal protein L23a pseudogene 74	17q23.2	2.443	1.1314	3.5746	1	1
HS6ST2	HS6ST2	HS6ST2	HS6ST2	heparan sulfate 6-O-sulfotransferase 2	Xq26.2	2.438	0.7080	3.1457	1	1
RPL30P4	RPL30P4	RPL30P4	RPL30P4	ribosomal protein L30 pseudogene 4	3p22.3	2.433	0.0000	2.4328	1	1
SNRPEP5	SNRPEP5	SNRPEP5	SNRPEP5	SNRPE pseudogene 5	2p25.1	2.433	0.0000	2.4328	1	1
LINC01600	LINC01600	LINC01600	LINC01600	long intergenic non-protein coding RNA 1600	6p25.2	-2.432	2.6988	0.2672	1	1
RPL34P18	RPL34P18	RPL34P18	RPL34P18	ribosomal protein L34 pseudogene 18	8q22.1	2.430	4.1010	6.5315	1	1
SINHCAFP2	SINHCAFP2	SINHCAFP2	SINHCAFP2	SINHCAF pseudogene 2	18q21.32	-2.430	5.0356	2.6056	1	1
CPN1	CPN1	CPN1	CPN1	carboxypeptidase N subunit 1	10q24.2	-2.427	3.3087	0.8822	1	1
COX6C	COX6C	COX6C	COX6C	cytochrome c oxidase subunit 6C	8q22.2	2.424	4.9181	7.3423	1	1
C3orf22	C3orf22	C3orf22	C3orf22	chromosome 3 open reading frame 22	3q21.3	-2.423	5.0281	2.6056	1	1
RPL21P39	RPL21P39	RPL21P39	RPL21P39	ribosomal protein L21 pseudogene 39	3q24	2.420	4.0244	6.4441	1	1
UBE2Q2P10	UBE2Q2P10	UBE2Q2P10	UBE2Q2P10	UBE2Q2 pseudogene 10	8q21.3	-2.419	2.8491	0.4301	1	1
SHBG	SHBG	SHBG	SHBG	sex hormone binding globulin	17p13.1	-2.419	2.8491	0.4301	1	1
RPL5P24	RPL5P24	RPL5P24	RPL5P24	ribosomal protein L5 pseudogene 24	8q22.3	2.417	3.9297	6.3469	1	1
GAPDHP35	GAPDHP35	GAPDHP35	GAPDHP35	glyceraldehyde 3 phosphate dehydrogenase pseudogen...	16p12.1	2.415	0.0000	2.4149	1	1
FTCD	FTCD	FTCD	FTCD	formimidoyltransferase cyclodeaminase	21q22.3	-2.414	7.3556	4.9414	1	1
RP2	RP2	RP2	RP2	RP2 activator of ARL3 GTPase	Xp11.3	2.414	1.0341	3.4481	1	1
RNU6-611P	RNU6-611P	RNU6-611P	RNU6-611P	RNA, U6 small nuclear 611, pseudogene	19q13.32	-2.413	5.5885	3.1757	1	1
PKP4-AS1	PKP4-AS1	PKP4-AS1	PKP4-AS1	PKP4 antisense RNA 1	2q24.1	-2.412	2.9883	0.5759	1	1
UPRT	UPRT	UPRT	UPRT	uracil phosphoribosyltransferase homolog	Xq13.3	2.412	0.8288	3.2404	1	1
LAPTM4A	LAPTM4A	LAPTM4A	LAPTM4A	lysosomal protein transmembrane 4 alpha	2p24.1	2.408	6.1131	8.5213	1	1
RPS29P19	RPS29P19	RPS29P19	RPS29P19	ribosomal protein S29 pseudogene 19	11q23.2	2.407	0.4301	2.8371	1	1
BFSP2-AS1	BFSP2-AS1	BFSP2-AS1	BFSP2-AS1	BFSP2 antisense RNA 1	3q22.1	-2.406	3.6279	1.2224	1	1
WASH5P	WASH5P	WASH5P	WASH5P	WASP family homolog 5, pseudogene	19p13.3	-2.404	4.1576	1.7540	1	1
VDAC1P1	VDAC1P1	VDAC1P1	VDAC1P1	voltage dependent anion channel 1 pseudogene 1	Xq21.1	-2.404	4.1576	1.7540	1	1
RPL22L1	RPL22L1	RPL22L1	RPL22L1	ribosomal protein L22 like 1	3q26.2	2.398	3.0545	5.4524	1	1
RNF2	RNF2	RNF2	RNF2	ring finger protein 2	1q25.3	2.397	1.5652	3.9622	1	1
FUCA1	FUCA1	FUCA1	FUCA1	alpha-L-fucosidase 1	1p36.11	2.393	2.3002	4.6933	1	1
PPP2R5D	PPP2R5D	PPP2R5D	PPP2R5D	protein phosphatase 2 regulatory subunit B'delta	6p21.1	-2.393	4.6933	2.3002	1	1
EEF1A1P24	EEF1A1P24	EEF1A1P24	EEF1A1P24	eukaryotic translation elongation factor 1 alpha 1...	3p22.1	2.392	0.5759	2.9680	1	1
ARHGAP27P1-BPTFP1-KPNA2P3	ARHGAP27P1-BPTFP1-KPNA2P3	ARHGAP27P1-BPTFP1-KPNA2P3	ARHGAP27P1-BPTFP1-KPNA2P3	ARHGAP27P1-BPTFP1-KPNA2P3 readthrough, transcribed...	17q24.1	2.387	3.1178	5.5050	1	1
ACAA2P1	ACAA2P1	ACAA2P1	ACAA2P1	ACAA2 pseudogene 1	Xp11.23	-2.385	3.8431	1.4578	1	1
VTI1BP1	VTI1BP1	VTI1BP1	VTI1BP1	vesicle transport through interaction with t-SNARE...	3q12.1	-2.383	3.5148	1.1314	1	1
SEC61B	SEC61B	SEC61B	SEC61B	SEC61 translocon subunit beta	9q22.33	2.383	4.7467	7.1300	1	1
MAD2L1	MAD2L1	MAD2L1	MAD2L1	mitotic arrest deficient 2 like 1	4q27	2.382	1.5652	3.9472	1	1
AGAP14P	AGAP14P	AGAP14P	AGAP14P	ArfGAP with GTPase domain, ankyrin repeat and PH d...	10q11.22	-2.380	5.7500	3.3701	1	1
VRK2	VRK2	VRK2	VRK2	VRK serine/threonine kinase 2	2p16.1	-2.379	5.4263	3.0469	1	1
DNAJB3	DNAJB3	DNAJB3	DNAJB3	DnaJ heat shock protein family (Hsp40) member B3	2q37.1	-2.377	5.2144	2.8371	1	1
BTN2A1	BTN2A1	BTN2A1	BTN2A1	butyrophilin subfamily 2 member A1	6p22.2	-2.377	6.1676	3.7910	1	1
NACA3P	NACA3P	NACA3P	NACA3P	NACA family member 3, pseudogene	4q32.3	2.376	0.8288	3.2052	1	1
GOLGA8DP	GOLGA8DP	GOLGA8DP	GOLGA8DP	golgin A8 family member D, pseudogene	15q11.2	-2.372	5.1794	2.8078	1	1
MIR601	MIR601	MIR601	MIR601	microRNA 601	9q33.3	-2.368	5.1037	2.7361	1	1
ARL4A	ARL4A	ARL4A	ARL4A	ADP ribosylation factor like GTPase 4A	7p21.3	2.362	2.4058	4.7679	1	1
SAP30L	SAP30L	SAP30L	SAP30L	SAP30 like	5q33.2	2.361	3.6476	6.0088	1	1
PPIAP22	PPIAP22	PPIAP22	PPIAP22	peptidylprolyl isomerase A pseudogene 22	21q21.1	2.360	2.7724	5.1328	1	1
SMARCD3	SMARCD3	SMARCD3	SMARCD3	SWI/SNF related, matrix associated, actin dependen...	7q36.1	-2.360	4.1576	1.7978	1	1
LAMC1-AS1	LAMC1-AS1	LAMC1-AS1	LAMC1-AS1	LAMC1 antisense RNA 1	1q25.3	-2.359	2.3587	0.0000	1	1
AGAP13P	AGAP13P	AGAP13P	AGAP13P	ArfGAP with GTPase domain, ankyrin repeat and PH d...	10q11.22	-2.351	6.4867	4.1355	1	1
ACIN1	ACIN1	ACIN1	ACIN1	apoptotic chromatin condensation inducer 1	14q11.2	-2.351	8.7767	6.4257	1	1
SLC35A2	SLC35A2	SLC35A2	SLC35A2	solute carrier family 35 member A2	Xp11.23	2.349	2.7361	5.0851	1	1
LINC00456	LINC00456	LINC00456	LINC00456	long intergenic non-protein coding RNA 456	13q32.1	-2.348	3.9136	1.5652	1	1
RPL4P5	RPL4P5	RPL4P5	RPL4P5	ribosomal protein L4 pseudogene 5	9p24.1	2.344	4.3116	6.6560	1	1
C17orf58	C17orf58	C17orf58	C17orf58	chromosome 17 open reading frame 58	17q24.2	2.342	0.4301	2.7724	1	1
TMTC3	TMTC3	TMTC3	TMTC3	transmembrane O-mannosyltransferase targeting cadh...	12q21.32	2.341	3.3701	5.7115	1	1
MTLN	MTLN	MTLN	MTLN	mitoregulin	2q13	2.336	1.0341	3.3701	1	1
KCND3-AS1	KCND3-AS1	KCND3-AS1	KCND3-AS1	KCND3 antisense RNA 1	1p13.2	-2.335	3.3981	1.0629	1	1
TLCD3A	TLCD3A	TLCD3A	TLCD3A	TLC domain containing 3A	17p13.3	2.330	1.3240	3.6542	1	1
SMIM3	SMIM3	SMIM3	SMIM3	small integral membrane protein 3	5q33.1	2.329	1.4040	3.7335	1	1
DUSP1	DUSP1	DUSP1	DUSP1	dual specificity phosphatase 1	5q35.1	2.329	1.4040	3.7335	1	1
PSME2P1	PSME2P1	PSME2P1	PSME2P1	proteasome activator subunit 2 pseudogene 1	5q15	2.329	0.0000	2.3293	1	1
KCNA7	KCNA7	KCNA7	KCNA7	potassium voltage-gated channel subfamily A member...	19q13.33	-2.329	3.9910	1.6617	1	1
NAMPTP1	NAMPTP1	NAMPTP1	NAMPTP1	nicotinamide phosphoribosyltransferase pseudogene ...	10p11.21	2.329	1.4796	3.8086	1	1
SNRPG	SNRPG	SNRPG	SNRPG	small nuclear ribonucleoprotein polypeptide G	2p13.3	2.325	4.0422	6.3668	1	1
RPL12P15	RPL12P15	RPL12P15	RPL12P15	ribosomal protein L12 pseudogene 15	2q14.3	-2.322	5.7204	3.3981	1	1
CCT8P1	CCT8P1	CCT8P1	CCT8P1	chaperonin containing TCP1 subunit 8 pseudogene 1	1q21.1	2.320	2.3002	4.6202	1	1
BSN	BSN	BSN	BSN	bassoon presynaptic cytomatrix protein	3p21.31	-2.316	3.9297	1.6135	1	1
ESAM	ESAM	ESAM	ESAM	endothelial cell adhesion molecule	11q24.2	2.315	0.3153	2.6298	1	1
MPZL2	MPZL2	MPZL2	MPZL2	myelin protein zero like 2	11q23.3	2.312	5.3293	7.6416	1	1
RPS27AP12	RPS27AP12	RPS27AP12	RPS27AP12	RPS27A pseudogene 12	7q36.3	2.309	5.4491	7.7581	1	1
SMARCC2	SMARCC2	SMARCC2	SMARCC2	SWI/SNF related, matrix associated, actin dependen...	12q13.2	-2.309	6.4806	4.1719	1	1
RPL21P37	RPL21P37	RPL21P37	RPL21P37	ribosomal protein L21 pseudogene 37	2p15	2.303	3.7086	6.0116	1	1
MAIP1	MAIP1	MAIP1	MAIP1	matrix AAA peptidase interacting protein 1	2q33.1	2.302	0.5759	2.8776	1	1
GPRC5B	GPRC5B	GPRC5B	GPRC5B	G protein-coupled receptor class C group 5 member ...	16p12.3	2.301	0.9609	3.2623	1	1
OR7E21P	OR7E21P	OR7E21P	OR7E21P	olfactory receptor family 7 subfamily E member 21 ...	3q22.1	2.301	0.9609	3.2623	1	1
H3P44	H3P44	H3P44	H3P44	H3 histone pseudogene 44	Xp11.22	2.300	0.0000	2.3002	1	1
CENPS	CENPS	CENPS	CENPS	centromere protein S	1p36.22	2.300	0.0000	2.3002	1	1
NPM1P39	NPM1P39	NPM1P39	NPM1P39	nucleophosmin 1 pseudogene 39	1p36.11	-2.298	4.7950	2.4973	1	1
VDAC1P6	VDAC1P6	VDAC1P6	VDAC1P6	voltage dependent anion channel 1 pseudogene 6	Yp11.2	-2.296	6.5410	4.2446	1	1
LINC02753	LINC02753	LINC02753	LINC02753	long intergenic non-protein coding RNA 2753	11q13.3	-2.296	3.1784	0.8822	1	1
ARF4	ARF4	ARF4	ARF4	ADP ribosylation factor 4	3p14.3	2.295	4.2989	6.5935	1	1
RPL5P9	RPL5P9	RPL5P9	RPL5P9	ribosomal protein L5 pseudogene 9	2q13	2.294	2.4058	4.6995	1	1
PPIAP46	PPIAP46	PPIAP46	PPIAP46	peptidylprolyl isomerase A pseudogene 46	15q24.1	2.293	3.7272	6.0206	1	1
SMG1P5	SMG1P5	SMG1P5	SMG1P5	SMG1 pseudogene 5	16p11.2	-2.293	5.5330	3.2404	1	1
PALB2	PALB2	PALB2	PALB2	partner and localizer of BRCA2	16p12.2	-2.291	4.6781	2.3866	1	1
COL18A1	COL18A1	COL18A1	COL18A1	collagen type XVIII alpha 1 chain	21q22.3	-2.289	3.0545	0.7658	1	1
HDHD3	HDHD3	HDHD3	HDHD3	haloacid dehalogenase like hydrolase domain contai...	9q32	-2.287	7.3574	5.0703	1	1
RPL7P24	RPL7P24	RPL7P24	RPL7P24	ribosomal protein L7 pseudogene 24	5q14.1	2.287	2.4602	4.7467	1	1
SNRPGP2	SNRPGP2	SNRPGP2	SNRPGP2	small nuclear ribonucleoprotein polypeptide G pseu...	18q21.2	2.286	2.0339	4.3198	1	1
CRB3	CRB3	CRB3	CRB3	crumbs cell polarity complex component 3	19p13.3	2.284	0.4301	2.7142	1	1
SNRPEP4	SNRPEP4	SNRPEP4	SNRPEP4	SNRPE pseudogene 4	19p13.3	2.284	0.4301	2.7142	1	1
OS9	OS9	OS9	OS9	OS9 endoplasmic reticulum lectin	12q13.3-q14.1	-2.284	6.7060	4.4225	1	1
DDX39B	DDX39B	DDX39B	DDX39B	DExD-box helicase 39B	6p21.33	-2.281	4.9721	2.6914	1	1
INO80E	INO80E	INO80E	INO80E	INO80 complex subunit E	16p11.2	-2.281	3.8941	1.6135	1	1
FAUP1	FAUP1	FAUP1	FAUP1	FAU pseudogene 1	18q22.3	-2.277	8.9703	6.6932	1	1
PORCN	PORCN	PORCN	PORCN	porcupine O-acyltransferase	Xp11.23	-2.276	3.5148	1.2393	1	1
DIPK2A	DIPK2A	DIPK2A	DIPK2A	divergent protein kinase domain 2A	3q24	2.275	1.3240	3.5989	1	1
COX7CP1	COX7CP1	COX7CP1	COX7CP1	COX7C pseudogene 1	13q14.2	2.274	1.8390	4.1132	1	1
SEM1	SEM1	SEM1	SEM1	SEM1 26S proteasome subunit	7q21.3	2.271	4.3383	6.6091	1	1
CLCNKB	CLCNKB	CLCNKB	CLCNKB	chloride voltage-gated channel Kb	1p36.13	-2.271	3.2314	0.9609	1	1
IL18BP	IL18BP	IL18BP	IL18BP	interleukin 18 binding protein	11q13.4	-2.269	5.6105	3.3415	1	1
ARHGEF1	ARHGEF1	ARHGEF1	ARHGEF1	Rho guanine nucleotide exchange factor 1	19q13.2	-2.268	6.7252	4.4568	1	1
FTH1P5	FTH1P5	FTH1P5	FTH1P5	ferritin heavy chain 1 pseudogene 5	6p12.3	2.268	1.9600	4.2283	1	1
NUDCP1	NUDCP1	NUDCP1	NUDCP1	nuclear distribution C pseudogene 1	2q23.3	-2.268	2.4058	0.1380	1	1
LCN12	LCN12	LCN12	LCN12	lipocalin 12	9q34.3	-2.266	5.2989	3.0329	1	1
RPL9P21	RPL9P21	RPL9P21	RPL9P21	ribosomal protein L9 pseudogene 21	10q11.21	2.266	2.5400	4.8060	1	1
TRMT112	TRMT112	TRMT112	TRMT112	tRNA methyltransferase activator subunit 11-2	11q13.1	2.264	5.3725	7.6360	1	1
GMEB2	GMEB2	GMEB2	GMEB2	glucocorticoid modulatory element binding protein ...	20q13.33	2.263	2.3002	4.5634	1	1
DNAJB9	DNAJB9	DNAJB9	DNAJB9	DnaJ heat shock protein family (Hsp40) member B9	7q31.1	2.262	1.7802	4.0422	1	1
LRATD2	LRATD2	LRATD2	LRATD2	LRAT domain containing 2	8q24.21	2.261	0.4301	2.6914	1	1
LINC02951	LINC02951	LINC02951	LINC02951	long intergenic non-protein coding RNA 2951	11q14.1	2.250	0.0000	2.2495	1	1
H2BC17	H2BC17	H2BC17	H2BC17	H2B clustered histone 17	6p22.1	-2.250	2.2495	0.0000	1	1
SMCR8	SMCR8	SMCR8	SMCR8	SMCR8-C9orf72 complex subunit	17p11.2	-2.248	4.9845	2.7361	1	1
RPLP0P6	RPLP0P6	RPLP0P6	RPLP0P6	ribosomal protein lateral stalk subunit P0 pseudog...	2p22.1	2.247	7.6904	9.9378	1	1
RPL4P2	RPL4P2	RPL4P2	RPL4P2	ribosomal protein L4 pseudogene 2	1q24.1	2.247	3.8431	6.0899	1	1
RNF113A	RNF113A	RNF113A	RNF113A	ring finger protein 113A	Xq24	2.245	1.2224	3.4671	1	1
ABHD11	ABHD11	ABHD11	ABHD11	abhydrolase domain containing 11	7q11.23	2.245	2.3002	4.5448	1	1
GHRLOS	GHRLOS	GHRLOS	GHRLOS	ghrelin opposite strand/antisense RNA	3p25.3	-2.244	3.2052	0.9609	1	1
RPS27A	RPS27A	RPS27A	RPS27A	ribosomal protein S27a	2p16.1	2.244	10.0257	12.2698	1	1
GAPDHP40	GAPDHP40	GAPDHP40	GAPDHP40	glyceraldehyde 3 phosphate dehydrogenase pseudogen...	5q33.3	2.244	2.0834	4.3271	1	1
ISOC1	ISOC1	ISOC1	ISOC1	isochorismatase domain containing 1	5q23.3	2.241	0.7080	2.9490	1	1
RPS3AP4	RPS3AP4	RPS3AP4	RPS3AP4	RPS3A pseudogene 4	14q13.2	2.241	0.7080	2.9490	1	1
TNFRSF21	TNFRSF21	TNFRSF21	TNFRSF21	TNF receptor superfamily member 21	6p12.3	2.238	4.1854	6.4238	1	1
RPL21P116	RPL21P116	RPL21P116	RPL21P116	ribosomal protein L21 pseudogene 116	15q25.1	2.231	2.1402	4.3716	1	1
RPL36AP39	RPL36AP39	RPL36AP39	RPL36AP39	ribosomal protein L36a pseudogene 39	11p15.5	2.227	1.4040	3.6308	1	1
ZNRF2	ZNRF2	ZNRF2	ZNRF2	zinc and ring finger 2	7p14.3	2.225	0.3153	2.5400	1	1
APOBEC2	APOBEC2	APOBEC2	APOBEC2	apolipoprotein B mRNA editing enzyme catalytic sub...	6p21.1	2.225	0.3153	2.5400	1	1
MFSD12	MFSD12	MFSD12	MFSD12	major facilitator superfamily domain containing 12	19p13.3	2.225	2.5897	4.8142	1	1
RPL10AP2	RPL10AP2	RPL10AP2	RPL10AP2	ribosomal protein L10a pseudogene 2	8q11.1	2.224	5.8998	8.1238	1	1
RPS29P5	RPS29P5	RPS29P5	RPS29P5	ribosomal protein S29 pseudogene 5	1q25.1	2.223	2.6688	4.8920	1	1
ZFY	ZFY	ZFY	ZFY	zinc finger protein Y-linked	Yp11.2	-2.223	3.9297	1.7069	1	1
SAPCD2	SAPCD2	SAPCD2	SAPCD2	suppressor APC domain containing 2	9q34.3	2.219	3.9136	6.1330	1	1
LYPD6B	LYPD6B	LYPD6B	LYPD6B	LY6/PLAUR domain containing 6B	2q23.2	2.218	0.5759	2.7940	1	1
RPL7AP17	RPL7AP17	RPL7AP17	RPL7AP17	ribosomal protein L7a pseudogene 17	1p21.2	2.218	0.5759	2.7940	1	1
APOBR	APOBR	APOBR	APOBR	apolipoprotein B receptor	16p12.1	-2.217	3.1784	0.9609	1	1
HOXC13	HOXC13	HOXC13	HOXC13	homeobox C13	12q13.13	2.215	1.4040	3.6190	1	1
HCCS	HCCS	HCCS	HCCS	holocytochrome c synthase	Xp22.2	2.213	2.4973	4.7107	1	1
FTH1P3	FTH1P3	FTH1P3	FTH1P3	ferritin heavy chain 1 pseudogene 3	2p23.3	2.210	1.1314	3.3415	1	1
RPL31P63	RPL31P63	RPL31P63	RPL31P63	ribosomal protein L31 pseudogene 63	Xq13.1	2.209	3.0247	5.2337	1	1
ARAP1-AS2	ARAP1-AS2	ARAP1-AS2	ARAP1-AS2	ARAP1 antisense RNA 2	11q13.4	-2.209	3.4481	1.2393	1	1
SQOR	SQOR	SQOR	SQOR	sulfide quinone oxidoreductase	15q21.1	2.207	1.4040	3.6110	1	1
NXT2	NXT2	NXT2	NXT2	nuclear transport factor 2 like export factor 2	Xq23	2.207	1.4040	3.6110	1	1
PGC	PGC	PGC	PGC	progastricsin	6p21.1	2.205	0.0000	2.2055	1	1
RPL7AP34	RPL7AP34	RPL7AP34	RPL7AP34	ribosomal protein L7a pseudogene 34	6q12	2.205	0.0000	2.2055	1	1
HIGD1AP1	HIGD1AP1	HIGD1AP1	HIGD1AP1	HIG1 hypoxia inducible domain family member 1A pse...	12q13.13	2.204	0.8288	3.0329	1	1
REXO1	REXO1	REXO1	REXO1	RNA exonuclease 1 homolog	19p13.3	-2.202	2.9105	0.7080	1	1
SNRPGP10	SNRPGP10	SNRPGP10	SNRPGP10	small nuclear ribonucleoprotein polypeptide G pseu...	1q32.1	2.198	0.9609	3.1586	1	1
SEM1P1	SEM1P1	SEM1P1	SEM1P1	SEM1 pseudogene 1	5q14.1	2.197	1.0341	3.2314	1	1
RPL5P3	RPL5P3	RPL5P3	RPL5P3	ribosomal protein L5 pseudogene 3	15q23	2.197	0.3153	2.5125	1	1
NPR 2.00	NPR 2.00	NPR 2.00	NPR 2.00	NA	NA	-2.196	2.7724	0.5759	1	1
RPS2P4	RPS2P4	RPS2P4	RPS2P4	ribosomal protein S2 pseudogene 4	14q32.33	2.195	2.6298	4.8250	1	1
EEF1A1P4	EEF1A1P4	EEF1A1P4	EEF1A1P4	eukaryotic translation elongation factor 1 alpha 1...	12p12.3	-2.193	5.3689	3.1757	1	1
PPIF	PPIF	PPIF	PPIF	peptidylprolyl isomerase F	10q22.3	2.193	2.6988	4.8920	1	1
ANKRD45	ANKRD45	ANKRD45	ANKRD45	ankyrin repeat domain 45	1q25.1	-2.193	2.4602	0.2672	1	1
CCDC24	CCDC24	CCDC24	CCDC24	coiled-coil domain containing 24	1p34.1	2.192	0.8288	3.0208	1	1
PXDC1	PXDC1	PXDC1	PXDC1	PX domain containing 1	6p25.2	2.192	0.8288	3.0208	1	1
RPLP0P9	RPLP0P9	RPLP0P9	RPLP0P9	ribosomal protein lateral stalk subunit P0 pseudog...	5q34	2.192	7.7800	9.9716	1	1
KLC3	KLC3	KLC3	KLC3	kinesin light chain 3	19q13.32	-2.190	4.5483	2.3587	1	1
NOP56P3	NOP56P3	NOP56P3	NOP56P3	NOP56 ribonucleoprotein pseudogene 3	12q21.2	-2.189	4.4389	2.2495	1	1
RPL4P4	RPL4P4	RPL4P4	RPL4P4	ribosomal protein L4 pseudogene 4	3q27.2	2.189	5.7204	7.9091	1	1
GLIS2	GLIS2	GLIS2	GLIS2	GLIS family zinc finger 2	16p13.3	2.186	2.0834	4.2694	1	1
TOMM70	TOMM70	TOMM70	TOMM70	translocase of outer mitochondrial membrane 70	3q12.2	2.185	4.4904	6.6753	1	1
INTS14	INTS14	INTS14	INTS14	integrator complex subunit 14	15q22.31	2.185	0.9609	3.1457	1	1
ANKRD39	ANKRD39	ANKRD39	ANKRD39	ankyrin repeat domain 39	2q11.2	2.184	1.5652	3.7491	1	1
NDC1	NDC1	NDC1	NDC1	NDC1 transmembrane nucleoporin	1p32.3	2.184	1.9600	4.1438	1	1
UCHL3	UCHL3	UCHL3	UCHL3	ubiquitin C-terminal hydrolase L3	13q22.2	2.184	1.9600	4.1438	1	1
CMYA5	CMYA5	CMYA5	CMYA5	cardiomyopathy associated 5	5q14.1	-2.182	4.3873	2.2055	1	1
PPP1R32	PPP1R32	PPP1R32	PPP1R32	NA	NA	-2.182	3.4211	1.2393	1	1
ACY1	ACY1	ACY1	ACY1	aminoacylase 1	3p21.2	-2.181	6.9680	4.7874	1	1
HLA-A	HLA-A	HLA-A	HLA-A	major histocompatibility complex, class I, A	6p22.1	2.180	6.9557	9.1352	1	1
HMGCS2	HMGCS2	HMGCS2	HMGCS2	3-hydroxy-3-methylglutaryl-CoA synthase 2	1p12	2.178	1.3240	3.5020	1	1
ARHGEF34P	ARHGEF34P	ARHGEF34P	ARHGEF34P	Rho guanine nucleotide exchange factor 34, pseudog...	7q35	-2.176	3.3981	1.2224	1	1
SEMA4G	SEMA4G	SEMA4G	SEMA4G	semaphorin 4G	10q24.31	-2.169	5.6836	3.5148	1	1
IER2	IER2	IER2	IER2	immediate early response 2	19p13.13	2.165	4.4173	6.5821	1	1
SLC4A3	SLC4A3	SLC4A3	SLC4A3	solute carrier family 4 member 3	2q35	-2.164	3.9622	1.7978	1	1
NDUFA4	NDUFA4	NDUFA4	NDUFA4	NDUFA4 mitochondrial complex associated	7p21.3	2.164	4.5033	6.6670	1	1
NXT1	NXT1	NXT1	NXT1	nuclear transport factor 2 like export factor 1	20p11.21	2.160	0.5759	2.7361	1	1
XCL2	XCL2	XCL2	XCL2	X-C motif chemokine ligand 2	1q24.2	2.160	0.0000	2.1600	1	1
RPS4XP13	RPS4XP13	RPS4XP13	RPS4XP13	ribosomal protein S4X pseudogene 13	11q12.1	2.160	0.0000	2.1600	1	1
TRIB3	TRIB3	TRIB3	TRIB3	tribbles pseudokinase 3	20p13	2.160	2.1402	4.3001	1	1
DDX12P	DDX12P	DDX12P	DDX12P	DEAD/H-box helicase 12, pseudogene	12p13.31	-2.159	3.3981	1.2393	1	1
TP53BP1	TP53BP1	TP53BP1	TP53BP1	tumor protein p53 binding protein 1	15q15.3	-2.157	6.7490	4.5915	1	1
AVP	AVP	AVP	AVP	arginine vasopressin	20p13	-2.157	3.1178	0.9609	1	1
TMEM14A	TMEM14A	TMEM14A	TMEM14A	transmembrane protein 14A	6p12.2	2.156	2.9883	5.1446	1	1
CDKN2D	CDKN2D	CDKN2D	CDKN2D	cyclin dependent kinase inhibitor 2D	19p13.2	2.155	1.0341	3.1893	1	1
MBNL3	MBNL3	MBNL3	MBNL3	muscleblind like splicing regulator 3	Xq26.2	2.152	4.6162	6.7683	1	1
RPS20P24	RPS20P24	RPS20P24	RPS20P24	ribosomal protein S20 pseudogene 24	9q21.13	2.151	2.4058	4.5572	1	1
RPL7P15	RPL7P15	RPL7P15	RPL7P15	ribosomal protein L7 pseudogene 15	3q21.2	2.151	3.1784	5.3293	1	1
ITGB1BP1	ITGB1BP1	ITGB1BP1	ITGB1BP1	integrin subunit beta 1 binding protein 1	2p25.1	2.150	2.3002	4.4501	1	1
HMGN2P21	HMGN2P21	HMGN2P21	HMGN2P21	high mobility group nucleosomal binding domain 2 p...	2p13.3	-2.147	3.8086	1.6617	1	1
HSPA1L	HSPA1L	HSPA1L	HSPA1L	heat shock protein family A (Hsp70) member 1 like	6p21.33	2.145	0.3153	2.4602	1	1
SLC25A5	SLC25A5	SLC25A5	SLC25A5	solute carrier family 25 member 5	Xq24	2.142	5.9380	8.0796	1	1
SNORA19	SNORA19	SNORA19	SNORA19	small nucleolar RNA, H/ACA box 19	10q26.11	-2.140	2.1402	0.0000	1	1
FAM177B	FAM177B	FAM177B	FAM177B	family with sequence similarity 177 member B	1q41	2.140	0.0000	2.1402	1	1
B3GNT7	B3GNT7	B3GNT7	B3GNT7	UDP-GlcNAc:betaGal beta-1,3-N-acetylglucosaminyltr...	2q37.1	2.140	0.0000	2.1402	1	1
MYZAP	MYZAP	MYZAP	MYZAP	myocardial zonula adherens protein	15q21.3	2.140	0.0000	2.1402	1	1
COPG2IT1	COPG2IT1	COPG2IT1	COPG2IT1	COPG2 imprinted transcript 1	7q32.2	-2.139	7.1503	5.0112	1	1
RPL7P32	RPL7P32	RPL7P32	RPL7P32	ribosomal protein L7 pseudogene 32	7q31.1	2.139	6.5328	8.6718	1	1
MICB	MICB	MICB	MICB	MHC class I polypeptide-related sequence B	6p21.33	2.138	0.5759	2.7142	1	1
SYPL1	SYPL1	SYPL1	SYPL1	synaptophysin like 1	7q22.3	2.137	3.6898	5.8272	1	1
SLC30A1	SLC30A1	SLC30A1	SLC30A1	solute carrier family 30 member 1	1q32.3	2.134	3.1457	5.2795	1	1
TM4SF1	TM4SF1	TM4SF1	TM4SF1	transmembrane 4 L six family member 1	3q25.1	2.132	4.5161	6.6483	1	1
UBE2S	UBE2S	UBE2S	UBE2S	ubiquitin conjugating enzyme E2 S	19q13.42	2.132	4.5033	6.6353	1	1
RPS26P39	RPS26P39	RPS26P39	RPS26P39	ribosomal protein S26 pseudogene 39	10q26.13	2.131	1.1314	3.2623	1	1
CCDC57	CCDC57	CCDC57	CCDC57	coiled-coil domain containing 57	17q25.3	-2.130	5.0789	2.9490	1	1
RRBP1	RRBP1	RRBP1	RRBP1	ribosome binding protein 1	20p12.1	-2.130	11.2455	9.1157	1	1
RETREG1-AS1	RETREG1-AS1	RETREG1-AS1	RETREG1-AS1	RETREG1 antisense RNA 1	5p15.1	-2.129	3.7910	1.6617	1	1
CCDC180	CCDC180	CCDC180	CCDC180	coiled-coil domain containing 180	9q22.33	-2.129	4.2127	2.0834	1	1
GSKIP	GSKIP	GSKIP	GSKIP	GSK3B interacting protein	14q32.2	2.126	2.0339	4.1603	1	1
PPP1CA	PPP1CA	PPP1CA	PPP1CA	protein phosphatase 1 catalytic subunit alpha	11q13.2	2.126	2.2495	4.3756	1	1
CLIC1	CLIC1	CLIC1	CLIC1	chloride intracellular channel 1	6p21.33	2.125	6.1582	8.2833	1	1
SLC37A1	SLC37A1	SLC37A1	SLC37A1	solute carrier family 37 member 1	21q22.3	2.125	1.7069	3.8318	1	1
ZNF646	ZNF646	ZNF646	ZNF646	zinc finger protein 646	16p11.2	-2.124	3.5816	1.4578	1	1
ABITRAM	ABITRAM	ABITRAM	ABITRAM	actin binding transcription modulator	9q31.3	2.120	0.8288	2.9490	1	1
TNS3	TNS3	TNS3	TNS3	tensin 3	7p12.3	-2.118	7.2293	5.1108	1	1
RPL9P32	RPL9P32	RPL9P32	RPL9P32	ribosomal protein L9 pseudogene 32	19q12	2.118	4.8090	6.9271	1	1
RPL26P19	RPL26P19	RPL26P19	RPL26P19	ribosomal protein L26 pseudogene 19	5q11.2	2.117	6.0126	8.1294	1	1
NRBF2P4	NRBF2P4	NRBF2P4	NRBF2P4	nuclear receptor binding factor 2 pseudogene 4	8q23.1	-2.117	3.6279	1.5114	1	1
WASH4P	WASH4P	WASH4P	WASH4P	WASP family homolog 4, pseudogene	16p13.3	-2.116	3.3379	1.2224	1	1
HIPK3	HIPK3	HIPK3	HIPK3	homeodomain interacting protein kinase 3	11p13	2.114	3.7491	5.8633	1	1
NUS1	NUS1	NUS1	NUS1	NUS1 dehydrodolichyl diphosphate synthase subunit	6q22.1	2.114	3.1784	5.2923	1	1
MCUR1P1	MCUR1P1	MCUR1P1	MCUR1P1	MCUR1 pseudogene 1	17p13.3	2.110	0.4301	2.5400	1	1
CA9	CA9	CA9	CA9	carbonic anhydrase 9	9p13.3	2.110	0.4301	2.5400	1	1
TNFRSF12A	TNFRSF12A	TNFRSF12A	TNFRSF12A	TNF receptor superfamily member 12A	16p13.3	2.109	1.9060	4.0154	1	1
EDRF1-AS1	EDRF1-AS1	EDRF1-AS1	EDRF1-AS1	EDRF1 antisense RNA 1	10q26.2	-2.109	4.4088	2.3002	1	1
PPIAP16	PPIAP16	PPIAP16	PPIAP16	peptidylprolyl isomerase A pseudogene 16	3p14.3	2.108	1.8390	3.9472	1	1
OR7E59P	OR7E59P	OR7E59P	OR7E59P	olfactory receptor family 7 subfamily E member 59 ...	7p22.1	2.104	0.0000	2.1040	1	1
SERPINA6	SERPINA6	SERPINA6	SERPINA6	serpin family A member 6	14q32.13	2.104	0.0000	2.1040	1	1
FGF23	FGF23	FGF23	FGF23	fibroblast growth factor 23	12p13.32	2.104	0.0000	2.1040	1	1
SMTNL2	SMTNL2	SMTNL2	SMTNL2	smoothelin like 2	17p13.2	2.104	0.9609	3.0647	1	1
MTFR2	MTFR2	MTFR2	MTFR2	mitochondrial fission regulator 2	6q23.3	2.104	0.9609	3.0647	1	1
TMTC4	TMTC4	TMTC4	TMTC4	transmembrane O-mannosyltransferase targeting cadh...	13q32.3	2.102	1.7069	3.8086	1	1
PSAT1	PSAT1	PSAT1	PSAT1	phosphoserine aminotransferase 1	9q21.2	2.101	0.8288	2.9301	1	1
MUC13	MUC13	MUC13	MUC13	mucin 13, cell surface associated	3q21.2	2.100	0.5759	2.6764	1	1
NT5DC1	NT5DC1	NT5DC1	NT5DC1	5'-nucleotidase domain containing 1	6q22.1	-2.100	6.2859	4.1854	1	1
MUC6	MUC6	MUC6	MUC6	mucin 6, oligomeric mucus/gel-forming	11p15.5	-2.099	3.3379	1.2393	1	1
DPP3	DPP3	DPP3	DPP3	dipeptidyl peptidase 3	11q13.2	2.095	1.0341	3.1291	1	1
SCGB1A1	SCGB1A1	SCGB1A1	SCGB1A1	secretoglobin family 1A member 1	11q12.3	-2.093	2.6688	0.5759	1	1
BIK	BIK	BIK	BIK	BCL2 interacting killer	22q13.2	2.091	2.7724	4.8633	1	1
SUMO3	SUMO3	SUMO3	SUMO3	small ubiquitin like modifier 3	21q22.3	2.090	4.8090	6.8988	1	1
CDCA7	CDCA7	CDCA7	CDCA7	cell division cycle associated 7	2q31.1	2.089	1.1314	3.2208	1	1
ADNP2	ADNP2	ADNP2	ADNP2	ADNP homeobox 2	18q23	2.088	2.0834	4.1719	1	1
AJUBA-DT	AJUBA-DT	AJUBA-DT	AJUBA-DT	AJUBA divergent transcript	14q11.2	-2.085	4.9956	2.9105	1	1
RPL7P47	RPL7P47	RPL7P47	RPL7P47	ribosomal protein L7 pseudogene 47	16p12.3	2.084	1.8390	3.9233	1	1
ENPP7	ENPP7	ENPP7	ENPP7	ectonucleotide pyrophosphatase/phosphodiesterase 7	17q25.3	-2.083	5.0717	2.9883	1	1
CCDC138	CCDC138	CCDC138	CCDC138	coiled-coil domain containing 138	2q13	2.083	0.0000	2.0834	1	1
LRP1-AS	LRP1-AS	LRP1-AS	LRP1-AS	LRP1 antisense RNA	12q13.3	-2.083	2.0834	0.0000	1	1
FBXO8	FBXO8	FBXO8	FBXO8	F-box protein 8	4q34.1	2.083	0.0000	2.0834	1	1
NIPA1	NIPA1	NIPA1	NIPA1	NIPA magnesium transporter 1	15q11.2	2.075	1.8390	3.9136	1	1
MMGT1	MMGT1	MMGT1	MMGT1	membrane magnesium transporter 1	Xq26.3	2.073	3.0247	5.0976	1	1
FAM104B	FAM104B	FAM104B	FAM104B	NA	NA	2.072	0.9609	3.0329	1	1
TMEM128	TMEM128	TMEM128	TMEM128	transmembrane protein 128	4p16.3	2.071	0.3153	2.3866	1	1
RPL23AP42	RPL23AP42	RPL23AP42	RPL23AP42	ribosomal protein L23a pseudogene 42	3q26.1	2.070	2.2495	4.3198	1	1
TUBB4B	TUBB4B	TUBB4B	TUBB4B	tubulin beta 4B class IVb	9q34.3	2.068	3.1178	5.1862	1	1
DNAJC4	DNAJC4	DNAJC4	DNAJC4	DnaJ heat shock protein family (Hsp40) member C4	11q13.1	2.067	0.4301	2.4973	1	1
UBR4	UBR4	UBR4	UBR4	ubiquitin protein ligase E3 component n-recognin 4	1p36.13	-2.067	8.5246	6.4575	1	1
UQCRFS1	UQCRFS1	UQCRFS1	UQCRFS1	ubiquinol-cytochrome c reductase, Rieske iron-sulf...	19q12	2.066	3.7086	5.7742	1	1
CTAGE6	CTAGE6	CTAGE6	CTAGE6	CTAGE family member 6	7q35	-2.065	3.2875	1.2224	1	1
GCH1	GCH1	GCH1	GCH1	GTP cyclohydrolase 1	14q22.2	2.064	0.7080	2.7724	1	1
MAPK8IP2	MAPK8IP2	MAPK8IP2	MAPK8IP2	mitogen-activated protein kinase 8 interacting pro...	22q13.33	-2.064	4.8002	2.7361	1	1
SNORC	SNORC	SNORC	SNORC	secondary ossification center associated regulator...	2q37.1	-2.064	3.0247	0.9609	1	1
ADO	ADO	ADO	ADO	2-aminoethanethiol dioxygenase	10q21.3	2.064	2.3587	4.4225	1	1
APOA1-AS	APOA1-AS	APOA1-AS	APOA1-AS	APOA1 antisense RNA	11q23.3	-2.063	3.4671	1.4040	1	1
PET117	PET117	PET117	PET117	PET117 cytochrome c oxidase chaperone	20p11.23	2.062	2.4058	4.4679	1	1
RPL7	RPL7	RPL7	RPL7	ribosomal protein L7	8q21.11	2.060	6.1445	8.2049	1	1
CHMP5	CHMP5	CHMP5	CHMP5	charged multivesicular body protein 5	9p13.3	2.059	2.7724	4.8313	1	1
CALR	CALR	CALR	CALR	calreticulin	19p13.13	-2.058	6.7395	4.6820	1	1
TUBGCP5	TUBGCP5	TUBGCP5	TUBGCP5	tubulin gamma complex component 5	15q11.2	-2.055	5.8735	3.8190	1	1
GTF3C1	GTF3C1	GTF3C1	GTF3C1	general transcription factor IIIC subunit 1	16p12.1	-2.054	6.9539	4.8997	1	1
PRICKLE2-AS3	PRICKLE2-AS3	PRICKLE2-AS3	PRICKLE2-AS3	PRICKLE2 antisense RNA 3	3p14.1	-2.054	2.6298	0.5759	1	1
SLIT3-AS2	SLIT3-AS2	SLIT3-AS2	SLIT3-AS2	SLIT3 antisense RNA 2	5q34	-2.054	2.6298	0.5759	1	1
PPIAP29	PPIAP29	PPIAP29	PPIAP29	peptidylprolyl isomerase A pseudogene 29	6p22.3	2.051	3.3981	5.4491	1	1
RPL21P129	RPL21P129	RPL21P129	RPL21P129	ribosomal protein L21 pseudogene 129	19p13.2	2.047	3.2052	5.2522	1	1
RPL35A	RPL35A	RPL35A	RPL35A	ribosomal protein L35a	3q29	2.047	8.4066	10.4534	1	1
PODXL2	PODXL2	PODXL2	PODXL2	podocalyxin like 2	3q21.3	-2.045	4.1286	2.0834	1	1
RCC2P6	RCC2P6	RCC2P6	RCC2P6	regulator of chromosome condensation 2 pseudogene ...	11q12.3	-2.045	4.0570	2.0120	1	1
EIF4A2	EIF4A2	EIF4A2	EIF4A2	eukaryotic translation initiation factor 4A2	3q27.3	2.045	6.0506	8.0954	1	1
RPL9P3	RPL9P3	RPL9P3	RPL9P3	ribosomal protein L9 pseudogene 3	14q13.2	2.044	5.1862	7.2306	1	1
C1RL-AS1	C1RL-AS1	C1RL-AS1	C1RL-AS1	C1RL antisense RNA 1	12p13.31	-2.044	6.4549	4.4110	1	1
PDIK1L	PDIK1L	PDIK1L	PDIK1L	PDLIM1 interacting kinase 1 like	1p36.11	2.043	0.3153	2.3587	1	1
STARD7	STARD7	STARD7	STARD7	StAR related lipid transfer domain containing 7	2q11.2	2.041	4.9250	6.9661	1	1
EIF4A1P10	EIF4A1P10	EIF4A1P10	EIF4A1P10	eukaryotic translation initiation factor 4A1 pseud...	Xq21.31	2.038	0.9609	2.9990	1	1
HSPA13	HSPA13	HSPA13	HSPA13	heat shock protein family A (Hsp70) member 13	21q11.2	2.038	1.3240	3.3619	1	1
CASC9	CASC9	CASC9	CASC9	cancer susceptibility 9	8q21.13	2.038	1.3240	3.3619	1	1
TUBA1A	TUBA1A	TUBA1A	TUBA1A	tubulin alpha 1a	12q13.12	2.038	3.6898	5.7276	1	1
RPL12P41	RPL12P41	RPL12P41	RPL12P41	ribosomal protein L12 pseudogene 41	19q13.32	2.035	1.8390	3.8743	1	1
SLX4	SLX4	SLX4	SLX4	SLX4 structure-specific endonuclease subunit	16p13.3	-2.035	4.9648	2.9301	1	1
SLIRPP1	SLIRPP1	SLIRPP1	SLIRPP1	SLIRP. pseudogene 1	Xq27.3	2.034	0.0000	2.0339	1	1
RDM1P4	RDM1P4	RDM1P4	RDM1P4	RDM1 pseudogene 4	17q24.1	-2.034	2.0339	0.0000	1	1
PHOSPHO2	PHOSPHO2	PHOSPHO2	PHOSPHO2	phosphatase, orphan 2	2q31.1	2.034	0.0000	2.0339	1	1
ARG2	ARG2	ARG2	ARG2	arginase 2	14q24.1	2.034	0.0000	2.0339	1	1
C1orf105	C1orf105	C1orf105	C1orf105	chromosome 1 open reading frame 105	1q24.3	2.034	0.0000	2.0339	1	1
UQCRFS1P1	UQCRFS1P1	UQCRFS1P1	UQCRFS1P1	ubiquinol-cytochrome c reductase, Rieske iron-sulf...	22q13.1	2.034	0.0000	2.0339	1	1
PRELID1P6	PRELID1P6	PRELID1P6	PRELID1P6	PRELID1 pseudogene 6	2p15	2.034	0.0000	2.0339	1	1
EEF1B2P6	EEF1B2P6	EEF1B2P6	EEF1B2P6	eukaryotic translation elongation factor 1 beta 2 ...	7q32.3	2.034	5.8922	7.9260	1	1
MFSD2B	MFSD2B	MFSD2B	MFSD2B	MFSD2 lysolipid transporter B, sphingolipid	2p23.3	2.034	1.5652	3.5989	1	1
MAPK6P3	MAPK6P3	MAPK6P3	MAPK6P3	mitogen-activated protein kinase 6 pseudogene 3	13q14.11	-2.033	2.3002	0.2672	1	1
POM121	POM121	POM121	POM121	POM121 transmembrane nucleoporin	7q11.23	-2.033	6.8009	4.7679	1	1
BNIP3L	BNIP3L	BNIP3L	BNIP3L	BCL2 interacting protein 3 like	8p21.2	2.032	5.7029	7.7348	1	1
RPL5P17	RPL5P17	RPL5P17	RPL5P17	ribosomal protein L5 pseudogene 17	5q14.3	2.031	3.4211	5.4524	1	1
HSPA8	HSPA8	HSPA8	HSPA8	heat shock protein family A (Hsp70) member 8	11q24.1	2.031	5.5750	7.6062	1	1
AVPR1A	AVPR1A	AVPR1A	AVPR1A	arginine vasopressin receptor 1A	12q14.2	-2.031	4.4173	2.3866	1	1
DAZAP2	DAZAP2	DAZAP2	DAZAP2	DAZ associated protein 2	12q13.13	2.030	6.4003	8.4304	1	1
ANKRD20A1	ANKRD20A1	ANKRD20A1	ANKRD20A1	ankyrin repeat domain 20 family member A1	9q21.11	-2.028	2.9105	0.8822	1	1
RPL7P8	RPL7P8	RPL7P8	RPL7P8	ribosomal protein L7 pseudogene 8	1p13.3	2.027	5.9343	7.9618	1	1
EPHA4	EPHA4	EPHA4	EPHA4	EPH receptor A4	2q36.1	2.027	1.1314	3.1586	1	1
VMA21	VMA21	VMA21	VMA21	vacuolar ATPase assembly factor VMA21	Xq28	2.025	3.2623	5.2870	1	1
PLA2G12B	PLA2G12B	PLA2G12B	PLA2G12B	phospholipase A2 group XIIB	10q22.1	2.024	1.8390	3.8633	1	1
ARHGAP39	ARHGAP39	ARHGAP39	ARHGAP39	Rho GTPase activating protein 39	8q24.3	-2.023	3.2623	1.2393	1	1
NPTN	NPTN	NPTN	NPTN	neuroplastin	15q24.1	2.020	4.5033	6.5237	1	1
SSC4D	SSC4D	SSC4D	SSC4D	scavenger receptor cysteine rich family member wit...	7q11.23	-2.020	4.4530	2.4328	1	1
GOLGA8B	GOLGA8B	GOLGA8B	GOLGA8B	golgin A8 family member B	15q14	-2.019	9.9716	7.9527	1	1
CTDSP2	CTDSP2	CTDSP2	CTDSP2	CTD small phosphatase 2	12q14.1	2.018	2.7361	4.7540	1	1
RPL7P56	RPL7P56	RPL7P56	RPL7P56	ribosomal protein L7 pseudogene 56	Xq26.3	2.017	2.4058	4.4225	1	1
PARD6B	PARD6B	PARD6B	PARD6B	par-6 family cell polarity regulator beta	20q13.13	2.017	5.2376	7.2542	1	1
TMEM39A	TMEM39A	TMEM39A	TMEM39A	transmembrane protein 39A	3q13.33	2.015	2.7724	4.7874	1	1
TOMM7	TOMM7	TOMM7	TOMM7	translocase of outer mitochondrial membrane 7	7p15.3	2.015	7.0671	9.0817	1	1
RPS12	RPS12	RPS12	RPS12	ribosomal protein S12	6q23.2	2.015	9.4800	11.4946	1	1
FBXO32	FBXO32	FBXO32	FBXO32	F-box protein 32	8q24.13	2.014	1.1314	3.1457	1	1
LINC00092	LINC00092	LINC00092	LINC00092	long intergenic non-protein coding RNA 92	9q22.32	-2.014	2.5897	0.5759	1	1
ADAM8	ADAM8	ADAM8	ADAM8	ADAM metallopeptidase domain 8	10q26.3	2.013	1.0341	3.0469	1	1
EEF1B2	EEF1B2	EEF1B2	EEF1B2	eukaryotic translation elongation factor 1 beta 2	2q33.3	2.012	7.3254	9.3379	1	1
TERF1P4	TERF1P4	TERF1P4	TERF1P4	TERF1 pseudogene 4	Xq21.1	2.012	0.0000	2.0120	1	1
DDIAS	DDIAS	DDIAS	DDIAS	DNA damage induced apoptosis suppressor	11q14.1	2.012	0.0000	2.0120	1	1
NEDD8P1	NEDD8P1	NEDD8P1	NEDD8P1	NEDD8 pseudogene 1	1p31.1	2.012	0.0000	2.0120	1	1
PRNP	PRNP	PRNP	PRNP	prion protein (Kanno blood group)	20p13	2.009	2.8491	4.8583	1	1
CHST6	CHST6	CHST6	CHST6	carbohydrate sulfotransferase 6	16q23.1	-2.008	4.0422	2.0339	1	1
MT-TR	MT-TR	MT-TR	MT-TR	NA	NA	2.007	0.9609	2.9680	1	1
CHRAC1	CHRAC1	CHRAC1	CHRAC1	chromatin accessibility complex subunit 1	8q24.3	2.004	1.8390	3.8431	1	1
ATP5MC3	ATP5MC3	ATP5MC3	ATP5MC3	ATP synthase membrane subunit c locus 3	2q31.1	2.004	5.6460	7.6495	1	1
RPL23AP75	RPL23AP75	RPL23AP75	RPL23AP75	ribosomal protein L23a pseudogene 75	17q21.2	2.003	0.4301	2.4328	1	1
DDX28	DDX28	DDX28	DDX28	DEAD-box helicase 28	16q22.1	2.003	0.4301	2.4328	1	1
ZFP91P1	ZFP91P1	ZFP91P1	ZFP91P1	ZFP91 pseudogene 1	2q14.3	-2.002	2.1402	0.1380	1	1
RCBTB2	RCBTB2	RCBTB2	RCBTB2	RCC1 and BTB domain containing protein 2	13q14.2	-2.002	2.1402	0.1380	1	1
