# Supplementary material for: Functional and Transcriptional Effects of a Hydrogen Sulfide Donor on the Intestinal Epithelial Barrier
Source: Research Square preprint supplement (doi:10.21203/rs.3.rs-7324506/v1), 2025-09-27
Supplement: Supplementary file 6 [file 9cf0619e3a47d12aeac16345.xlsx]

## Sheet: Sheet 1
feature	symbol	human_ortholog	gene_name	gene_title	chr	logFC	AveExpr0	AveExpr1	meta.q	ttest.q
APPBP2-DT	APPBP2-DT	APPBP2-DT	APPBP2-DT	APPBP2 divergent transcript	17q23.2	2.131	0.2672	2.3985	1	1
RPS15AP5	RPS15AP5	RPS15AP5	RPS15AP5	ribosomal protein S15a pseudogene 5	10q26.13	-2.130	2.2678	0.1380	1	1
PLAAT2	PLAAT2	PLAAT2	PLAAT2	phospholipase A and acyltransferase 2	11q12.3	-2.118	2.4328	0.3153	1	1
RNU4ATAC	RNU4ATAC	RNU4ATAC	RNU4ATAC	RNA, U4atac small nuclear	2q14.2	2.109	4.2283	6.3370	1	1
HLA-K	HLA-K	HLA-K	HLA-K	major histocompatibility complex, class I, K (pseu...	6p22.1	2.083	0.0000	2.0834	1	1
