# Supplementary material for: Functional and Transcriptional Effects of a Hydrogen Sulfide Donor on the Intestinal Epithelial Barrier
Source: Research Square preprint supplement (doi:10.21203/rs.3.rs-7324506/v1), 2025-09-27
Supplement: Supplementary file 7 [file dc61b63f6b566f2d7a249cac.xlsx]

## Sheet: Sheet 1
symbol	gene_title	fc	p	q
TIMM10	translocase of inner mitochondrial membrane 10	-1.4271	1	1
ALAS1	5'-aminolevulinate synthase 1	1.0795	1	1
NDUFS7	NADH:ubiquinone oxidoreductase core subunit S7	-1.0511	1	1
TIMM8B	translocase of inner mitochondrial membrane 8 homolog B	-1.0406	1	1
MRPS22	mitochondrial ribosomal protein S22	1.0205	1	1
SLC25A4	solute carrier family 25 member 4	-0.8692	1	1
ATP5ME	ATP synthase membrane subunit e	-0.8570	1	1
NDUFA4	NDUFA4 mitochondrial complex associated	-0.8554	1	1
MRPL11	mitochondrial ribosomal protein L11	-0.8388	1	1
NDUFA1	NADH:ubiquinone oxidoreductase subunit A1	-0.8251	1	1
NDUFA7	NADH:ubiquinone oxidoreductase subunit A7	-0.8161	1	1
BDH2	3-hydroxybutyrate dehydrogenase 2	-0.7410	1	1
COX5A	cytochrome c oxidase subunit 5A	-0.7350	1	1
SLC25A3	solute carrier family 25 member 3	-0.7271	1	1
COX17	cytochrome c oxidase copper chaperone COX17	-0.7247	1	1
COX6C	cytochrome c oxidase subunit 6C	-0.7101	1	1
HCCS	holocytochrome c synthase	-0.7067	1	1
MRPS15	mitochondrial ribosomal protein S15	-0.7034	1	1
ACAA1	acetyl-CoA acyltransferase 1	-0.7008	1	1
BCKDHA	branched chain keto acid dehydrogenase E1 subunit alpha	0.6937	1	1
TOMM22	translocase of outer mitochondrial membrane 22	-0.6927	1	1
ACO2	aconitase 2	0.6889	1	1
MTRF1	mitochondrial translation release factor 1	0.6866	1	1
NDUFV2	NADH:ubiquinone oxidoreductase core subunit V2	-0.6800	1	1
OAT	ornithine aminotransferase	-0.6588	1	1
ATP5PO	ATP synthase peripheral stalk subunit OSCP	-0.6563	1	1
IDH1	isocitrate dehydrogenase (NADP(+)) 1	-0.6383	1	1
BAX	BCL2 associated X, apoptosis regulator	-0.6093	1	1
DECR1	2,4-dienoyl-CoA reductase 1	0.6043	1	1
TIMM9	translocase of inner mitochondrial membrane 9	-0.5813	1	1
UQCRC2	ubiquinol-cytochrome c reductase core protein 2	-0.5741	1	1
ATP6V0E1	ATPase H+ transporting V0 subunit e1	-0.5645	1	1
NDUFA2	NADH:ubiquinone oxidoreductase subunit A2	-0.5452	1	1
POR	cytochrome p450 oxidoreductase	0.5419	1	1
MRPL15	mitochondrial ribosomal protein L15	-0.5391	1	1
ATP5MC3	ATP synthase membrane subunit c locus 3	-0.5373	1	1
NDUFB7	NADH:ubiquinone oxidoreductase subunit B7	0.5346	1	1
UQCRFS1	ubiquinol-cytochrome c reductase, Rieske iron-sulfur polypep...	-0.5236	1	1
ACADM	acyl-CoA dehydrogenase medium chain	0.5073	1	1
COX10	cytochrome c oxidase assembly factor heme A:farnesyltransfer...	0.5053	1	1
NDUFB6	NADH:ubiquinone oxidoreductase subunit B6	-0.5040	1	1
FDX1	ferredoxin 1	-0.5029	1	1
NDUFB1	NADH:ubiquinone oxidoreductase subunit B1	-0.4967	1	1
ATP6V1H	ATPase H+ transporting V1 subunit H	-0.4775	1	1
COX7A2	cytochrome c oxidase subunit 7A2	-0.4734	1	1
HSD17B10	hydroxysteroid 17-beta dehydrogenase 10	-0.4696	1	1
ABCB7	ATP binding cassette subfamily B member 7	0.4685	1	1
ACADSB	acyl-CoA dehydrogenase short/branched chain	0.4634	1	1
MDH2	malate dehydrogenase 2	-0.4634	1	1
IDH3A	isocitrate dehydrogenase (NAD(+)) 3 catalytic subunit alpha	0.4515	1	1
MRPL34	mitochondrial ribosomal protein L34	-0.4447	1	1
COX7B	cytochrome c oxidase subunit 7B	-0.4399	1	1
CASP7	caspase 7	-0.4385	1	1
ETFB	electron transfer flavoprotein subunit beta	-0.4364	1	1
TIMM17A	translocase of inner mitochondrial membrane 17A	-0.4312	1	1
UQCR11	ubiquinol-cytochrome c reductase, complex III subunit XI	-0.4302	1	1
ATP6V1E1	ATPase H+ transporting V1 subunit E1	0.4285	1	1
MRPS12	mitochondrial ribosomal protein S12	-0.4265	1	1
CYB5A	cytochrome b5 type A	-0.4245	1	1
SUCLG1	succinate-CoA ligase GDP/ADP-forming subunit alpha	0.4141	1	1
AFG3L2	AFG3 like matrix AAA peptidase subunit 2	0.4075	1	1
SUCLA2	succinate-CoA ligase ADP-forming subunit beta	-0.4063	1	1
ETFDH	electron transfer flavoprotein dehydrogenase	0.4061	1	1
SLC25A5	solute carrier family 25 member 5	-0.4044	1	1
HSPA9	heat shock protein family A (Hsp70) member 9	0.3932	1	1
ECH1	enoyl-CoA hydratase 1	-0.3833	1	1
ATP5PF	ATP synthase peripheral stalk subunit F6	-0.3776	1	1
TIMM13	translocase of inner mitochondrial membrane 13	-0.3647	1	1
RETSAT	retinol saturase	-0.3634	1	1
ATP5F1B	ATP synthase F1 subunit beta	-0.3602	1	1
VDAC2	voltage dependent anion channel 2	-0.3570	1	1
MFN2	mitofusin 2	0.3527	1	1
UQCRB	ubiquinol-cytochrome c reductase binding protein	-0.3484	1	1
SDHC	succinate dehydrogenase complex subunit C	-0.3482	1	1
UQCRQ	ubiquinol-cytochrome c reductase complex III subunit VII	-0.3481	1	1
COX6A1	cytochrome c oxidase subunit 6A1	-0.3462	1	1
NDUFB5	NADH:ubiquinone oxidoreductase subunit B5	-0.3454	1	1
RHOT2	ras homolog family member T2	-0.3453	1	1
ATP5F1C	ATP synthase F1 subunit gamma	-0.3439	1	1
PDP1	pyruvate dehydrogenase phosphatase catalytic subunit 1	0.3358	1	1
NDUFC1	NADH:ubiquinone oxidoreductase subunit C1	-0.3354	1	1
NDUFA3	NADH:ubiquinone oxidoreductase subunit A3	-0.3299	1	1
ATP5F1D	ATP synthase F1 subunit delta	-0.3221	1	1
NDUFA6	NADH:ubiquinone oxidoreductase subunit A6	-0.3193	1	1
ACAT1	acetyl-CoA acetyltransferase 1	0.3184	1	1
COX6B1	cytochrome c oxidase subunit 6B1	-0.3105	1	1
IDH2	isocitrate dehydrogenase (NADP(+)) 2	-0.3089	1	1
HADHB	hydroxyacyl-CoA dehydrogenase trifunctional multienzyme comp...	-0.3057	1	1
NDUFS4	NADH:ubiquinone oxidoreductase subunit S4	-0.3029	1	1
NDUFB2	NADH:ubiquinone oxidoreductase subunit B2	-0.2969	1	1
MRPL35	mitochondrial ribosomal protein L35	-0.2964	1	1
ATP6V1G1	ATPase H+ transporting V1 subunit G1	-0.2931	1	1
VDAC3	voltage dependent anion channel 3	-0.2909	1	1
MAOB	monoamine oxidase B	0.2900	1	1
ACADVL	acyl-CoA dehydrogenase very long chain	0.2869	1	1
HTRA2	HtrA serine peptidase 2	0.2750	1	1
ATP5PB	ATP synthase peripheral stalk-membrane subunit b	-0.2704	1	1
NDUFC2	NADH:ubiquinone oxidoreductase subunit C2	-0.2566	1	1
COX4I1	cytochrome c oxidase subunit 4I1	-0.2479	1	1
LDHA	lactate dehydrogenase A	-0.2477	1	1
TIMM50	translocase of inner mitochondrial membrane 50	-0.2469	1	1
VDAC1	voltage dependent anion channel 1	0.2445	1	1
SLC25A6	solute carrier family 25 member 6	-0.2436	1	1
ISCU	iron-sulfur cluster assembly enzyme	-0.2427	1	1
TOMM70	translocase of outer mitochondrial membrane 70	-0.2382	1	1
ALDH6A1	aldehyde dehydrogenase 6 family member A1	-0.2375	1	1
ETFA	electron transfer flavoprotein subunit alpha	-0.2365	1	1
ATP6V1D	ATPase H+ transporting V1 subunit D	0.2343	1	1
PRDX3	peroxiredoxin 3	-0.2311	1	1
SDHD	succinate dehydrogenase complex subunit D	-0.2285	1	1
PDHB	pyruvate dehydrogenase E1 subunit beta	-0.2238	1	1
MRPS30	mitochondrial ribosomal protein S30	-0.2235	1	1
MTX2	metaxin 2	-0.2197	1	1
NDUFS8	NADH:ubiquinone oxidoreductase core subunit S8	-0.2197	1	1
SLC25A20	solute carrier family 25 member 20	-0.2180	1	1
GOT2	glutamic-oxaloacetic transaminase 2	0.2123	1	1
RHOT1	ras homolog family member T1	0.2119	1	1
ATP5F1A	ATP synthase F1 subunit alpha	-0.2084	1	1
HADHA	hydroxyacyl-CoA dehydrogenase trifunctional multienzyme comp...	0.2066	1	1
ATP1B1	ATPase Na+/K+ transporting subunit beta 1	0.2057	1	1
ATP5MF	ATP synthase membrane subunit f	-0.2039	1	1
NDUFS1	NADH:ubiquinone oxidoreductase core subunit S1	0.1921	1	1
SDHA	succinate dehydrogenase complex flavoprotein subunit A	-0.1883	1	1
FH	fumarate hydratase	-0.1860	1	1
DLD	dihydrolipoamide dehydrogenase	-0.1819	1	1
UQCRC1	ubiquinol-cytochrome c reductase core protein 1	0.1646	1	1
SLC25A12	solute carrier family 25 member 12	-0.1612	1	1
ATP5MG	ATP synthase membrane subunit g	-0.1572	1	1
UQCRH	ubiquinol-cytochrome c reductase hinge protein	-0.1511	1	1
POLR2F	RNA polymerase II, I and III subunit F	-0.1425	1	1
NDUFA9	NADH:ubiquinone oxidoreductase subunit A9	0.1422	1	1
LDHB	lactate dehydrogenase B	-0.1398	1	1
PHB2	prohibitin 2	0.1390	1	1
FXN	frataxin	-0.1385	1	1
SDHB	succinate dehydrogenase complex iron sulfur subunit B	-0.1384	1	1
CYCS	cytochrome c, somatic	-0.1350	1	1
NDUFS3	NADH:ubiquinone oxidoreductase core subunit S3	-0.1316	1	1
PDHA1	pyruvate dehydrogenase E1 subunit alpha 1	-0.1297	1	1
ATP5PD	ATP synthase peripheral stalk subunit d	-0.1266	1	1
ATP6V1F	ATPase H+ transporting V1 subunit F	-0.1253	1	1
COX7A2L	cytochrome c oxidase subunit 7A2 like	-0.1226	1	1
SUPV3L1	Suv3 like RNA helicase	0.1204	1	1
CPT1A	carnitine palmitoyltransferase 1A	-0.1147	1	1
NDUFB8	NADH:ubiquinone oxidoreductase subunit B8	-0.1115	1	1
GPX4	glutathione peroxidase 4	-0.1106	1	1
NDUFB4	NADH:ubiquinone oxidoreductase subunit B4	0.1089	1	1
MGST3	microsomal glutathione S-transferase 3	-0.0960	1	1
NDUFA8	NADH:ubiquinone oxidoreductase subunit A8	-0.0942	1	1
MPC1	mitochondrial pyruvate carrier 1	0.0941	1	1
ATP5F1E	ATP synthase F1 subunit epsilon	-0.0897	1	1
NDUFA5	NADH:ubiquinone oxidoreductase subunit A5	-0.0854	1	1
NNT	nicotinamide nucleotide transhydrogenase	-0.0832	1	1
IDH3B	isocitrate dehydrogenase (NAD(+)) 3 non-catalytic subunit be...	0.0818	1	1
ISCA1	iron-sulfur cluster assembly 1	-0.0690	1	1
COX7C	cytochrome c oxidase subunit 7C	-0.0613	1	1
SURF1	SURF1 cytochrome c oxidase assembly factor	-0.0605	1	1
NDUFB3	NADH:ubiquinone oxidoreductase subunit B3	-0.0558	1	1
DLAT	dihydrolipoamide S-acetyltransferase	0.0546	1	1
TCIRG1	T cell immune regulator 1, ATPase H+ transporting V0 subunit...	0.0538	1	1
PMPCA	peptidase, mitochondrial processing subunit alpha	-0.0455	1	1
NDUFAB1	NADH:ubiquinone oxidoreductase subunit AB1	-0.0419	1	1
IDH3G	isocitrate dehydrogenase (NAD(+)) 3 non-catalytic subunit ga...	0.0381	1	1
CYB5R3	cytochrome b5 reductase 3	-0.0350	1	1
ATP5MC2	ATP synthase membrane subunit c locus 2	0.0333	1	1
IMMT	inner membrane mitochondrial protein	0.0315	1	1
MRPS11	mitochondrial ribosomal protein S11	0.0298	1	1
NDUFV1	NADH:ubiquinone oxidoreductase core subunit V1	-0.0292	1	1
COX5B	cytochrome c oxidase subunit 5B	-0.0204	1	1
CYC1	cytochrome c1	0.0110	1	1
LRPPRC	leucine rich pentatricopeptide repeat containing	0.0074	1	1
DLST	dihydrolipoamide S-succinyltransferase	-0.0070	1	1
COX8A	cytochrome c oxidase subunit 8A	-0.0064	1	1
NDUFS6	NADH:ubiquinone oxidoreductase subunit S6	0.0061	1	1
ATP5MC1	ATP synthase membrane subunit c locus 1	-0.0040	1	1
OXA1L	OXA1L mitochondrial inner membrane protein	-0.0027	1	1
ATP6V0C	ATPase H+ transporting V0 subunit c	0.0000	1	1
