# Supplementary material for: Functional and Transcriptional Effects of a Hydrogen Sulfide Donor on the Intestinal Epithelial Barrier
Source: Research Square preprint supplement (doi:10.21203/rs.3.rs-7324506/v1), 2025-09-27
Supplement: Supplementary file 8 [file de99e479d42ae6530e67ffaf.xlsx]

## Sheet: Sheet 1
feature	symbol	human_ortholog	gene_name	gene_title	chr	logFC	AveExpr0	AveExpr1	meta.q	ttest.q
GOLGA8VP	GOLGA8VP	GOLGA8VP	GOLGA8VP	golgin A8 family member V, pseudogene	15q26.3	4.074	0.0000	4.0744	1	1
5_8S_rRNA	5_8S_rRNA	5_8S_rRNA	5_8S_rRNA	NA	NA	-2.878	7.6551	4.7768	1	1
LYPD6B	LYPD6B	LYPD6B	LYPD6B	LY6/PLAUR domain containing 6B	2q23.2	2.872	0.5759	3.4481	1	1
CCDC183-AS1	CCDC183-AS1	CCDC183-AS1	CCDC183-AS1	CCDC183 antisense RNA 1	9q34.3	-2.819	3.6702	0.8509	1	1
RNA5-8SN2	RNA5-8SN2	RNA5-8SN2	RNA5-8SN2	RNA, 5.8S ribosomal N2	21p11.2	-2.783	6.0914	3.3087	1	1
LINC02428	LINC02428	LINC02428	LINC02428	long intergenic non-protein coding RNA 2428	4q24	2.760	0.0000	2.7598	1	1
RNA5-8SN4	RNA5-8SN4	RNA5-8SN4	RNA5-8SN4	RNA, 5.8S ribosomal N4	NA	-2.755	6.1493	3.3946	1	1
SETP21	SETP21	SETP21	SETP21	SET pseudogene 21	5q12.1	2.749	1.4796	4.2283	1	1
RNA5-8SN3	RNA5-8SN3	RNA5-8SN3	RNA5-8SN3	RNA, 5.8S ribosomal N3	21p11.2	-2.732	6.1534	3.4211	1	1
RNA5-8SN1	RNA5-8SN1	RNA5-8SN1	RNA5-8SN1	RNA, 5.8S ribosomal N1	21p11.2	-2.725	6.1194	3.3946	1	1
EIF1P5	EIF1P5	EIF1P5	EIF1P5	eukaryotic translation initiation factor 1 pseudog...	17p11.2	2.707	1.7069	4.4142	1	1
RNA5-8SN5	RNA5-8SN5	RNA5-8SN5	RNA5-8SN5	RNA, 5.8S ribosomal N5	NA	-2.664	6.0847	3.4211	1	1
CEACAM6	CEACAM6	CEACAM6	CEACAM6	CEA cell adhesion molecule 6	19q13.2	2.629	0.4301	3.0589	1	1
INHBC	INHBC	INHBC	INHBC	inhibin subunit beta C	12q13.3	-2.540	2.5400	0.0000	1	1
ARL4A	ARL4A	ARL4A	ARL4A	ADP ribosylation factor like GTPase 4A	7p21.3	2.512	2.4058	4.9181	1	1
HSF2	HSF2	HSF2	HSF2	heat shock transcription factor 2	6q22.31	2.477	1.5652	4.0422	1	1
MGAT3-AS1	MGAT3-AS1	MGAT3-AS1	MGAT3-AS1	MGAT3 antisense RNA 1	22q13.1	2.448	0.4301	2.8776	1	1
RPS3AP34	RPS3AP34	RPS3AP34	RPS3AP34	RPS3A pseudogene 34	8p23.1	2.448	0.4301	2.8776	1	1
NAV2-AS5	NAV2-AS5	NAV2-AS5	NAV2-AS5	NAV2 antisense RNA 5	11p15.1	-2.428	3.5590	1.1314	1	1
PIWIL4	PIWIL4	PIWIL4	PIWIL4	piwi like RNA-mediated gene silencing 4	11q21	2.426	1.1314	3.5570	1	1
MUC13	MUC13	MUC13	MUC13	mucin 13, cell surface associated	3q21.2	2.423	0.5759	2.9990	1	1
DNAJC4	DNAJC4	DNAJC4	DNAJC4	DnaJ heat shock protein family (Hsp40) member C4	11q13.1	2.407	0.4301	2.8371	1	1
CHST6	CHST6	CHST6	CHST6	carbohydrate sulfotransferase 6	16q23.1	-2.380	4.0422	1.6617	1	1
FILIP1	FILIP1	FILIP1	FILIP1	filamin A interacting protein 1	6q14.1	-2.359	2.3587	0.0000	1	1
UGT1A4	UGT1A4	UGT1A4	UGT1A4	UDP glucuronosyltransferase family 1 member A4	2q37.1	-2.348	3.3087	0.9609	1	1
SRGAP2D	SRGAP2D	SRGAP2D	SRGAP2D	SLIT-ROBO Rho GTPase activating protein 2D (pseudo...	1q21.1	2.332	1.0341	3.3665	1	1
HSPD1P4	HSPD1P4	HSPD1P4	HSPD1P4	heat shock protein family D (Hsp60) member 1 pseud...	12q13.3	2.310	2.6688	4.9793	1	1
HNRNPA3P4	HNRNPA3P4	HNRNPA3P4	HNRNPA3P4	heterogeneous nuclear ribonucleoprotein A3 pseudog...	6p12.3	2.302	0.5759	2.8776	1	1
ESYT3	ESYT3	ESYT3	ESYT3	extended synaptotagmin 3	3q22.3	2.302	0.5759	2.8776	1	1
SOCS5P4	SOCS5P4	SOCS5P4	SOCS5P4	suppressor of cytokine signaling 5 pseudogene 4	Xq13.1	2.274	0.3153	2.5897	1	1
BEND3	BEND3	BEND3	BEND3	BEN domain containing 3	6q21	2.274	0.3153	2.5897	1	1
SETP4	SETP4	SETP4	SETP4	SET pseudogene 4	Xq21.1	2.271	1.7069	3.9778	1	1
ZNF454	ZNF454	ZNF454	ZNF454	zinc finger protein 454	5q35.3	-2.267	3.3981	1.1314	1	1
RPL7AP62	RPL7AP62	RPL7AP62	RPL7AP62	ribosomal protein L7a pseudogene 62	15q21.1	2.261	0.5759	2.8371	1	1
SETP22	SETP22	SETP22	SETP22	SET pseudogene 22	5q15	2.261	0.5759	2.8371	1	1
LINC00216	LINC00216	LINC00216	LINC00216	long intergenic non-protein coding RNA 216	14q23.1	2.253	1.0341	3.2875	1	1
HMGN2P17	HMGN2P17	HMGN2P17	HMGN2P17	high mobility group nucleosomal binding domain 2 p...	1p36.23	-2.250	2.2495	0.0000	1	1
ARAP1-AS2	ARAP1-AS2	ARAP1-AS2	ARAP1-AS2	ARAP1 antisense RNA 2	11q13.4	-2.226	3.4481	1.2224	1	1
C18orf21	C18orf21	C18orf21	C18orf21	chromosome 18 open reading frame 21	18q12.2	2.205	0.0000	2.2055	1	1
PELO-AS1	PELO-AS1	PELO-AS1	PELO-AS1	PELO antisense RNA 1	5q11.2	2.205	0.0000	2.2055	1	1
ZNF426-DT	ZNF426-DT	ZNF426-DT	ZNF426-DT	ZNF426 divergent transcript	19p13.2	-2.202	2.9105	0.7080	1	1
RNF113A	RNF113A	RNF113A	RNF113A	ring finger protein 113A	Xq24	2.172	1.2224	3.3946	1	1
SAR1AP3	SAR1AP3	SAR1AP3	SAR1AP3	secretion associated Ras related GTPase 1A pseudog...	4q27	2.140	0.0000	2.1402	1	1
SNORA19	SNORA19	SNORA19	SNORA19	small nucleolar RNA, H/ACA box 19	10q26.11	-2.140	2.1402	0.0000	1	1
CCDC138	CCDC138	CCDC138	CCDC138	coiled-coil domain containing 138	2q13	2.140	0.0000	2.1402	1	1
TGM5	TGM5	TGM5	TGM5	transglutaminase 5	15q15.2	2.140	0.0000	2.1402	1	1
CHORDC2P	CHORDC2P	CHORDC2P	CHORDC2P	cysteine and histidine rich domain containing 2, p...	14q32.11	2.140	0.0000	2.1402	1	1
SHLD3	SHLD3	SHLD3	SHLD3	shieldin complex subunit 3	5q12.3	2.129	0.7080	2.8371	1	1
CENPQ	CENPQ	CENPQ	CENPQ	centromere protein Q	6p12.3	2.127	2.8147	4.9414	1	1
VTI1BP1	VTI1BP1	VTI1BP1	VTI1BP1	vesicle transport through interaction with t-SNARE...	3q12.1	-2.111	3.5148	1.4040	1	1
FABP5P11	FABP5P11	FABP5P11	FABP5P11	fatty acid binding protein 5 pseudogene 11	22q11.1	2.101	0.8288	2.9301	1	1
GPM6B	GPM6B	GPM6B	GPM6B	glycoprotein M6B	Xp22.2	2.100	0.5759	2.6764	1	1
RAPH1	RAPH1	RAPH1	RAPH1	Ras association (RalGDS/AF-6) and pleckstrin homol...	2q33.2	2.100	0.3153	2.4149	1	1
HSPA13	HSPA13	HSPA13	HSPA13	heat shock protein family A (Hsp70) member 13	21q11.2	2.097	1.3240	3.4211	1	1
LBX2-AS1	LBX2-AS1	LBX2-AS1	LBX2-AS1	LBX2 antisense RNA 1	2p13.1	-2.093	2.6688	0.5759	1	1
RNU6-97P	RNU6-97P	RNU6-97P	RNU6-97P	RNA, U6 small nuclear 97, pseudogene	17q25.1	2.084	1.0341	3.1178	1	1
XCL2	XCL2	XCL2	XCL2	X-C motif chemokine ligand 2	1q24.2	2.083	0.0000	2.0834	1	1
PSME2P1	PSME2P1	PSME2P1	PSME2P1	proteasome activator subunit 2 pseudogene 1	5q15	2.083	0.0000	2.0834	1	1
ADAM21	ADAM21	ADAM21	ADAM21	ADAM metallopeptidase domain 21	14q24.2	2.083	0.0000	2.0834	1	1
TMEM145	TMEM145	TMEM145	TMEM145	transmembrane protein 145	19q13.2	-2.083	2.0834	0.0000	1	1
FABP5P7	FABP5P7	FABP5P7	FABP5P7	fatty acid binding protein 5 pseudogene 7	11q12.1	2.068	0.9609	3.0293	1	1
GSG1L2	GSG1L2	GSG1L2	GSG1L2	GSG1 like 2	17p13.1	-2.061	2.4058	0.3445	1	1
ZNF333	ZNF333	ZNF333	ZNF333	zinc finger protein 333	19p13.12	-2.060	2.9105	0.8509	1	1
CDC23	CDC23	CDC23	CDC23	cell division cycle 23	5q31.2	2.056	2.2055	4.2618	1	1
SLC2A3P2	SLC2A3P2	SLC2A3P2	SLC2A3P2	solute carrier family 2 member 3 pseudogene 2	1p31.3	2.054	0.5759	2.6298	1	1
OSTCP4	OSTCP4	OSTCP4	OSTCP4	oligosaccharyltransferase complex subunit pseudoge...	4q25	2.050	1.6617	3.7114	1	1
APOBR	APOBR	APOBR	APOBR	apolipoprotein B receptor	16p12.1	-2.047	3.1784	1.1314	1	1
EPOR	EPOR	EPOR	EPOR	erythropoietin receptor	19p13.2	2.034	0.0000	2.0339	1	1
PHOSPHO2	PHOSPHO2	PHOSPHO2	PHOSPHO2	phosphatase, orphan 2	2q31.1	2.034	0.0000	2.0339	1	1
MFSD13B	MFSD13B	MFSD13B	MFSD13B	major facilitator superfamily domain containing 13...	16p12.2	2.034	0.0000	2.0339	1	1
PDCD6IPP2	PDCD6IPP2	PDCD6IPP2	PDCD6IPP2	PDCD6IP pseudogene 2	15q13.1	2.034	0.0000	2.0339	1	1
RALBP1P1	RALBP1P1	RALBP1P1	RALBP1P1	RALBP1 pseudogene 1	3q26.33	2.030	3.1178	5.1474	1	1
CLCNKB	CLCNKB	CLCNKB	CLCNKB	chloride voltage-gated channel Kb	1p36.13	-2.009	3.2314	1.2224	1	1
LINC02694	LINC02694	LINC02694	LINC02694	long intergenic non-protein coding RNA 2694	15q14	-2.003	3.5148	1.5114	1	1
RCBTB2	RCBTB2	RCBTB2	RCBTB2	RCC1 and BTB domain containing protein 2	13q14.2	-2.002	2.1402	0.1380	1	1
LY6G6C	LY6G6C	LY6G6C	LY6G6C	lymphocyte antigen 6 family member G6C	6p21.33	-2.002	2.1402	0.1380	1	1
